# Supplementary material for: A Mathematical Model for the Determination of Steady-State Cardiolipin Remodeling Mechanisms Using Lipidomic Data
Source: PLoS One. 2011 Jun 10;6(6):e21170. doi: 10.1371/journal.pone.0021170 (PMC3112230; doi:10.1371/journal.pone.0021170)
Supplement: Table S1 — PC, PE, PG, acyl CoA, and CL concentrations as measured by MDMS-SL. (XLS) [file pone.0021170.s002.xls]

## Sheet: B6 NS
species from primary mass	Monoisotopic mass	nmol/mg protein					nmol/mg protein					nmol/mg protein			nmol/mg protein
PC	[PC-H]-	replicate1	replicate2	replicate3	PE	[PE-H]-	replicate1	replicate2	replicate3	PG	[PG-H]-		CL	[CL-2H]2-	replicate1	replicate2	replicate3
D14:0-16:0	712.547	0.261404	0.468636	0.307072	D16:0-18:1	716.523	6.28043	5.05326	3.99294	A16:0-16:0	707.523		18:1-18:1-16:1-16:1	699.978	0.306539	0.325449	0.271626
P16:0-16:1/P16:1-16:0/P18:1-14:0	722.568	0.12503	0	0	D18:0-18:2/D18:1-18:1/D16:0-20:2	742.539	5.12224	5.66784	4.43355	16:0-16:1	719.486	0.286601	18:1-18:1-16:0-16:1 18:2-18:1-16:0-16:0 18:2-18:0-16:1-16:0	700.986	0.328817	0.254272	0.343761
A16:0-16:1	724.583	0.067428	0.0798587	0.114762	P16:0-22:6/D18:0-18:0/P18:2-20:4	746.512	10.6105	8.48353	8.00861	16:0-16:0	721.502	0.491863	18:1-18:1-16:0-16:0 18:2-18:0-16:0-16:0 18:1-18:0-16:0-16:1	701.994	0.280479	0.240607	0.207313
A16:0-16:0	726.599	0.191224	0	0.134024	D16:0-22:6	762.507	9.19066	10.2831	8.711	16:1-18:2	743.486	0.216887	20:4-18:2-16:1-16:1	709.963	0.107872	0.0811471	0.0846277
D14:1-18:1	736.547	0.147047	0.371497	0.42192	D16:0-22:5/D18:1-20:4	764.523	8.71041	9.32775	8.30432	16:0-18:2	745.502	0.540964	20:4-18:1-16:1-16:1 20:4-18:2-16:1-16:0	710.97	0.469374	0.394249	0.352656
D16:1-16:0/D14:1-18:0	738.563	2.53109	2.73969	1.89951	D18:0-20:4/D16:0-22:4	766.539	38.5754	39.1852	34.7237	16:0-18:1	747.518	3.4143	20:4-18:1-16:1-16:0 18:2-18:2-18:1-16:1	711.978	0.477832	0.486596	0.379914
D16:0-16:0	740.578	9.5944	11.4262	8.98623	D18:1-20:2/D16:0-22:3/D18:0-20:3	768.554	10.4042	14.0048	10.0596	18:2-18:2	769.502	0.816156	18:2-18:1-18:1-16:1 18:1-18:1-18:1-16:2 18:2-18:1-18:0-16:2 18:2-18:2-18:0-16:1	712.986	0.728461	0.722618	0.688218
A16:0-18:3	748.583	0	0	0	P18:0-22:6/P18:1-22:5/D18:0-20:0	774.544	12.0142	9.72874	9.36793	18:1-18:2	771.518	0.294032	18:1-18:1-18:1-16:1 18:2-18:1-18:1-16:0	713.994	1.70021	1.47829	1.245
P18:1-16:0	750.599	0	0	0.142393	P18:0-22:5/P18:1-22:4	776.559	5.72722	9.78781	6.3569	18:1-18:1	773.533	0.47248	18:1-18:1-18:1-16:0 18:0-18:1-18:1-16:1	715.002	0.701547	0.630009	0.697061
P16:0-18:0/P18:0-16:0/A18:1-16:0	752.615	0.209587	0.278228	0.16023	P18:0-22:4/P20:0-20:4/P18:1-22:3	778.575	1.66328	2.69477	2.33518	18:0-18:1	775.549	0.546804	18:0-18:1-18:1-16:0 18:0-18:0-18:1-16:1	716.01	0.114371	0.0655957	0.0907701
D14:1-20:3/D16:2-18:2/D14:0-20:4	760.547	0.13705	0.188581	0.0687766	D18:1-22:6	788.523	6.00711	6.36714	5.48568				20:4-20:4-16:1-16:1	721.963	0.227176	0.264599	0.211107
D16:1-18:2	762.563	0.25753	0.0791882	0.100071	D18:0-22:6/D18:1-22:5	790.539	58.4148	59.9147	56.2027				20:4-20:4-16:1-16:0 20:4-18:2-18:2-16:1	722.97	0.3763	0.368353	0.326355
D16:0-18:2	764.578	1.7329	1.96096	1.43869	D18:1-22:4/D18:0-22:5	792.554	3.79852	3.76445	3.28478				20:4-18:2-18:1-16:1	723.978	1.00173	0.996957	0.857282
D16:0-18:1	766.594	34.7113	33.1077	32.1097	D20:0-20:4/D18:1-22:3/D18:0-22:4	794.57	6.94459	6.03386	6.6218				20:4-18:2-18:1-16:0 20:4-18:1-18:1-16:1	724.986	2.40497	2.19821	2.06687
D16:0-18:0	768.609	2.1874	2.70231	2.52532	D20:0-20:3/D18:0-22:3	796.586	5.64673	8.28934	6.60205				20:4-18:1-18:1-16:0 20:3-18:1-18:1-16:1 20:3-18:1-18:1-16:1	725.994	1.84539	1.7898	1.59025
P18:2-18:2/P16:0-20:4/P20:4-16:0	772.583	0	0	0.0824308									18:2-18:1-18:1-18:1	727.002	2.81577	2.47781	2.15155
A16:0-20:4	774.599	0.0883773	0	0.0537533									18:1-18:1-18:1-18:1	728.01	4.55256	3.40893	3.21217
P18:1-18:1	776.615	0	0	0									18:1-18:1-18:1-18:0	729.017	0.30552	0.32755	0.267203
P18:1-18:0	778.63	0.161555	0.0814955	0.0610813									22:6-20:4-16:1-16:1	733.963	0.154798	0.15666	0.123416
A18:0-18:1/P18:0-18:0	780.646	0.61634	0.610406	0.529777									20:4-20:4-18:2-16:1	734.97	0.60823	0.575733	0.491608
A16:0-20:0	782.661	8.3049	4.27603	9.67722									20:4-20:4-18:1-16:1	735.978	1.59404	1.30355	1.32235
D18:2-18:3/D16:1-20:4	786.563	0.638838	0.407665	0.536									20:4-20:4-18:1-16:0 22:6-18:1-18:1-16:1 22:6-18:2-18:1-16:0	736.986	2.14069	2.16198	2.03951
D18:2-18:2/D16:0-20:4	788.578	24.8348	22.8514	22.4291									20:4-18:2-18:1-18:1 22:6-18:1-18:1-16:0	737.994	3.02945	2.71082	2.29997
D18:1-18:2/D16:0-20:3	790.594	1.22426	1.05078	0.947105									20:4-18:1-18:1-18:1	739.002	3.82701	3.04676	3.03159
D18:0-18:2/D18:1-18:1	792.609	4.50821	3.6956	4.2577									20:4-18:1-18:1-18:0 20:3-18:1-18:1-18:1	740.01	1.20328	1.08203	0.921173
D18:0-18:1	794.625	4.31899	4.86153	3.94914									20:4-18:1-18:0-18:0 20:3-18:1-18:1-18:0	741.017	0.347445	0.198856	0.203586
D18:0-18:0	796.641	0.128593	0	0.121497									22:6-18:3-18:2-18:2	746.97	0.369864	0.442588	0.373489
P18:1-20:4	798.599	0.0636744	0.0775353	0.0752984									20:4-20:4-18:2-18:2 20:4-20:4-20:4-16:0 22:6-20:4-18:1-16:1 22:6-22:6-16:0-16:0 22:6-18:2-18:2-18:2	747.978	1.40068	1.45336	1.27107
P18:0-20:4	800.615	0.0710129	0.0700618	0.0588759									20:4-20:4-18:2-18:1	748.986	2.11925	2.08311	1.76779
P18:2-20:1/P20:1-18:2/A18:0-20:4	802.63	0.186631	0.244543	0.387071									20:4-20:4-18:1-18:1	749.994	3.49658	3.18394	3.03001
A18:0-20:0	810.693	0.941788	0.658899	1.12317									22:6-18:1-18:1-18:1 20:4-20:3-18:1-18:1	751.002	2.6745	2.68702	2.85654
D16:0-22:6/D18:2-20:4	812.578	14.8374	13.3665	13.6258									22:6-18:1-18:1-18:0	752.01	0.735119	0.434557	0.436474
D18:1-20:4/D16:0-22:5	814.594	6.28812	4.87871	5.82321									20:4-20:2-18:1-18:0 20:4-20:1-18:1-18:1	753.017	0.133954	0.186277	0.116745
D18:2-20:2/D18:0-20:4	816.609	11.8378	10.3221	11.9209									20:4-20:1-18:1-18:0	754.025	0.0971201	0.111699	0.0729958
D18:0-20:3	818.625	0.479507	0.166249	0.422212									22:6-20:4-20:4-16:1 22:6-22:6-18:2-16:1	758.97	0.360206	0.327435	0.283505
D18:0-20:2/P18:2-22:6	820.641	0.190099	0.160158	0.13635									22:6-20:4-18:2-18:2 22:6-20:4-20:4-16:0 22:6-22:6-18:1-16:1	759.978	0.749534	0.812695	0.722423
P18:1-22:6	822.656	0.0434956	0.207257	0.0550344									22:6-20:4-18:2-18:1	760.986	1.7953	1.72616	1.62956
P18:0-22:6/P18:1-22:5	824.615	0.0151184	0	0.0482335									22:6-20:4-18:1-18:1	761.994	3.0194	3.11637	2.68075
A18:0-22:6/P18:0-22:5	826.63	0.0678513	0	0.0861317									22:6-20:4-18:1-18:0 22:6-20:3-18:1-18:1	763.002	1.00495	1.08091	0.989373
D18:2-22:6	836.578	0.163648	0	0.203832									22:4-20:4-18:1-18:1 22:6-20:3-18:1-18:0	764.01	0.244926	0.219329	0.264737
D18:1-22:6/D18:2-22:5	838.594	1.6433	0	2.21244									22:6-20:4-20:4-18:3	770.97	0.235033	0.15541	0.158324
D18:0-22:6/D20:2-20:4	840.609	2.31768	0	3.89427									22:6-22:6-20:4-16:0 20:4-20:4-20:4-20:4 22:6-20:4-20:4-18:2 22:6-22:6-18:2-18:2	771.978	0.406648	0.47974	0.382825
D18:0-22:5/D20:2-20:3	842.625	0.238575	0	0.362405									22:6-20:4-20:4-18:1	772.986	1.53169	1.43251	1.29384
D18:0-22:4/D20:0-20:4/D20:2-20:2	844.641	0.158682	0	0.268895									22:6-22:6-18:1-18:1 22:6-20:4-20:3-18:1	773.994	1.90967	1.7414	1.7736
													16:0-20:3-22:5-22:5 18:2-20:3-20:3-22:5 18:0-18:1-22:6-22:6 18:0-20:3-20:4-22:6	775.002	0.312592	0.365807	0.175861
													18:0-18:0-22:6-22:6	776.01	0.176788	0.20312	0.111807
													22:6-22:6-20:4-18:2	783.978	0.377593	0.3437	0.271661
													22:6-22:6-20:4-18:1	784.986	0.929583	0.999228	0.91382
													22:6-22:6-20:4-18:1 22:6-20:4-20:4-20:3	785.994	0.399896	0.413976	0.341749
													20:4-20:4-22:6-22:6	795.978	0.246724	0.348155	0.160089
													22:6-22:6-22:6-18:1 22:6-22:6-20:4-20:3	796.986	0.512562	0.52633	0.453688
													20:4-20:3-22:6-22:5 22:6-22:6-22:6-18:0 22:6-22:6-22:5-18:1	797.994	0.179073	0.208904	0.0792348

## Sheet: Astrocyte vitro
PC					PE					PG			CL
A14:0-16:0	698.568	0.795459	0.664718	0.416596	P16:0-18:2	698.512	2.58582	1.63752	2.68468	A16:0-16:0	707.523	0.884361	18:1-16:1-16:1-16:1	684.955	1.11206	0.356042	0.472884
D14:0-16:1	710.531	3.9665	4.18234	5.49546	P18:1-16:0/P16:0-18:1	700.528	6.39556	4.16474	6.41577	16:0-16:1	719.486	0.409734	18:1-16:1-16:1-16:0	685.963	1.48364	1.28082	1.48976
D14:0-16:0	712.547	4.54147	5.56061	4.26053	P18:0-16:0/P16:0-18:0	702.544	2.50399	1.52552	2.21169	16:0-16:0	721.502	0.26886	18:1-16:1-16:0-16:0	686.97	1.15071	0.831969	0.669142
P16:0-16:1/P16:1-16:0/P18:1-14:0	722.568	0.328361	0.491642	0.367268	D16:1-18:2	712.492	1.66621	1.48522	1.70217	16:1-18:2	743.486	0.266126	18:2-18:1-16:1-16:1	698.97	1.037	0.946983	1.48898
P16:0-16:0/A16:0-16:1	724.583	2.49941	2.84318	2.83872	D16:0-18:2/D16:1-18:1	714.507	3.33665	3.15385	3.48979	16:0-18:2	745.502	0.946311	18:1-18:1-16:1-16:1	699.978	3.25492	3.40921	4.13226
A16:0-16:0	726.599	1.67136	2.37435	1.88864	D16:0-18:1	716.523	5.17739	4.7754	5.50115	16:0-18:1	747.518	2.22912	18:1-18:1-16:0-16:1 18:2-18:1-16:0-16:0 18:2-18:0-16:1-16:0	700.986	1.60863	1.71044	1.42175
D16:1-16:1/D14:1-18:1	736.547	2.12171	3.85429	2.47491	P14:0-22:6	718.481	1.14681	0.777183	0.810517	18:2-18:2	769.502	0.373984	18:1-18:1-16:0-16:0 18:2-18:0-16:0-16:0 18:1-18:0-16:0-16:1	701.994	0.972347	0.735451	0.832412
D16:1-16:0/D14:1-18:0	738.563	17.4921	20.1217	21.759	P16:1-20:4/ P14:0-22:5	720.497	2.40417	1.56736	2.2846	18:1-18:2	771.518	0.448439	20:4-18:2-16:1-16:1	709.963	0.237874	0.274125	0.240488
D16:0-16:0	740.578	3.95929	5.52206	4.17887	P16:0-20:4	722.512	10.8511	8.16652	12.5873	18:1-18:1	773.533	1.40637	20:4-18:1-16:1-16:1 20:4-18:2-16:1-16:0	710.97	0.446697	0.682186	0.611877
P16:0-18:2/A16:0-18:3	748.583	0.104864	0.176421	0.136786	P16:0-20:3/P18:1-18:2	724.528	3.45912	2.48028	4.11056	18:0-18:1	775.549	0.435167	20:4-18:1-16:1-16:0 18:2-18:2-18:1-16:1	711.978	0.748119	0.731785	0.991872
P16:0-18:1/P18:1-16:0	750.599	1.11149	1.40447	1.25681	P18:1-18:1/P18:0-18:2/P16:0-20:2	726.544	2.9076	1.91029	3.47032				18:2-18:1-18:1-16:1 18:1-18:1-18:1-16:2 18:2-18:1-18:0-16:2 18:2-18:2-18:0-16:1	712.986	2.15325	1.83282	2.93177
P16:0-18:0/P18:0-16:0/A18:1-16:0/A16:0-18:1	752.615	3.99901	4.45286	4.18884	P18:0-18:1/P16:0-20:1	728.559	3.04875	1.72697	2.8475				18:1-18:1-18:1-16:1 18:2-18:1-18:1-16:0	713.994	2.36906	2.24887	3.02468
D14:1-20:3/D16:2-18:2/D14:0-20:4	760.547	0	0.274829	0	A18:0-18:1	730.575	3.88312	3.65221	3.80362				18:1-18:1-18:1-16:0 18:0-18:1-18:1-16:1	715.002	0.590561	0.547128	0.625125
D16:1-18:2	762.563	0.463145	1.20797	0.508721	D14:1-22:6	732.46	0.90682	0.641686	0.634602				18:0-18:1-18:1-16:0 18:0-18:0-18:1-16:1	716.01	0.234782	0.227206	0.271433
D16:0-18:2	764.578	6.40741	8.50821	9.30118	D16:2-20:4/D14:1-22:5	734.476	0.695975	0.599389	0.655322				O-20:4-18:1-16:1-16:0 O-18:2-18:2-18:1-16:1	719.976	0.319483	0.205968	0.312382
D16:0-18:1	766.594	25.9737	24.3383	32.9127	D16:1-20:4	736.492	1.74289	1.66844	1.70181				O-18:2-18:1-18:1-16:1 O-18:1-18:1-18:1-16:2 O-18:2-18:1-18:0-16:2 O-18:2-18:2-18:0-16:1	720.984	0.599264	0.30254	0.354192
D16:0-18:0	768.609	1.02476	1.48772	1.23282	D16:0-20:4/D18:2-18:2	738.507	3.105	3.49833	3.48623				20:4-20:4-16:1-16:1	721.963	0.348155	0.163055	0.194869
P16:0-20:4/P20:4-16:0/P18:2-18:2	772.583	0.629125	0.483181	0.555746	D18:1-18:2/D16:0-20:3	740.523	1.74886	1.41155	1.56289				20:4-20:4-16:1-16:0 20:4-18:2-18:2-16:1	722.97	0.455515	0.297185	0.345952
A16:0-20:4	774.599	0.269777	0.585922	0.187315	D18:0-18:2/D18:1-18:1/D16:0-20:2	742.539	3.6409	3.39429	4.2099				20:4-18:2-18:1-16:1	723.978	0.333011	0.497909	0.567708
P18:1-18:1	776.615	0.648709	0.772704	0.599319	D18:0-18:1/D16:0-20:1	744.554	9.36898	7.49731	9.23447				20:4-18:2-18:1-16:0 20:4-18:1-18:1-16:1	724.986	0.529079	0.553715	0.676919
P18:0-18:1/P18:1-18:0	778.63	1.84422	1.94029	2.33349	P16:0-22:6/D18:0-18:0/P18:2-20:4	746.512	7.82555	6.846	8.66728				20:4-18:1-18:1-16:0 20:3-18:1-18:1-16:1 20:3-18:1-18:1-16:1	725.994	0.586135	0.563677	1.00951
A18:0-18:1/P18:0-18:0	780.646	3.41398	4.23097	4.87991	P18:1-20:4/P16:0-22:5	748.528	15.0679	12.0328	16.2043				18:2-18:1-18:1-18:1	727.002	0.85375	0.551455	1.07973
A16:0-20:0	782.661	6.76688	7.77091	9.5568	P18:0-20:4/P16:0-22:4/P18:1-20:3	750.544	7.65873	6.17119	9.05035				18:1-18:1-18:1-18:1	728.01	0.431605	0.367283	0.647245
D18:2-18:3/D16:1-20:4	786.563	0	0.796966	0	P18:0-20:3	752.559	3.51742	2.86674	3.79743				18:1-18:1-18:1-18:0	729.017	0.287473	0.173509	0.267137
D18:2-18:2/D16:0-20:4	788.578	2.14101	4.49464	1.44297	P20:1-18:1/P18:1-20:1	754.575	1.65498	1.10627	1.60194				O-20:4-20:4-16:1-16:0 O-20:4-18:2-18:2-16:1	730.968	0.279342	0.187659	0.241654
D18:1-18:2/D16:0-20:3	790.594	2.87565	3.17707	2.67709	P18:1-20:0	756.591	1.00749	0.526013	0.889667				O-20:4-18:2-18:1-16:1	731.976	0.116805	0.119731	0.11847
D18:0-18:2/D18:1-18:1	792.609	10.1391	8.6733	14.986	P20:0-18:0/P18:0-20:0	758.476	1.25655	0.959304	1.21346				22:6-20:4-16:1-16:1	733.963	0.0915218	0.0816221	0.11399
D18:0-18:1	794.625	12.5336	8.02619	17.2908	D16:1-22:6	760.492	1.50312	1.29403	1.43175				20:4-20:4-18:2-16:1	734.97	0.210749	0.107705	0.152621
D18:0-18:0	796.641	1.3548	0.7161	1.35907	D16:0-22:6	762.507	2.11061	2.44776	2.26879				20:4-20:4-18:1-16:1	735.978	0.18443	0.146226	0.209302
P18:1-20:4	798.599	1.59617	1.12292	1.30301	D18:1-20:4/D16:0-22:5	764.523	4.09485	5.26722	4.98023				20:4-20:4-18:1-16:0 22:6-18:1-18:1-16:1 22:6-18:2-18:1-16:0	736.986	0.336884	0.248498	0.374965
P18:0-20:4	800.615	6.51301	2.3854	7.9268	D18:1-20:3/D18:0-20:4/D16:0-22:4	766.539	13.2469	15.9941	14.8811				20:4-18:2-18:1-18:1 22:6-18:1-18:1-16:0	737.994	0.387514	0.298356	0.345601
P18:2-20:1/P20:1-18:2/A18:0-20:4	802.63	0.842226	1.16314	0.587371	D18:0-20:3/D18:1-20:2/D16:0-22:3	768.554	8.53443	5.42215	6.77481				20:4-18:1-18:1-18:1	739.002	0.270579	0.187929	0.250745
A18:0-20:0	810.693	1.57206	4.23762	1.77701	P18:2-22:6/D18:1-20:1	770.512	1.09367	0.640661	0.804803				20:4-18:1-18:1-18:0 20:3-18:1-18:1-18:1	740.01	0.254597	0.161616	0.215312
D16:0-22:6/D18:2-20:4	812.578	1.2432	2.38115	0	P18:1-22:6/D18:0-20:1	772.528	3.21724	2.72923	3.6269				20:4-18:1-18:0-18:0 20:3-18:1-18:1-18:0	741.017	0.115229	0.0866764	0.079824
D18:1-20:4/D16:0-22:5	814.594	2.68586	3.79221	1.80103	P18:0-22:6/P18:1-22:5/D18:0-20:0	774.544	4.52875	3.49227	5.50168				22:6-18:3-18:2-18:2	746.97	0.19246	0.103614	0.15348
D18:2-20:2/D18:0-20:4	816.609	6.12871	6.84617	5.37508	P18:0-22:5/P18:1-22:4	776.559	4.11201	3.33313	4.40523				20:4-20:4-18:2-18:2 20:4-20:4-20:4-16:0 22:6-20:4-18:1-16:1 22:6-22:6-16:0-16:0 22:6-18:2-18:2-18:2	747.978	0.472104	0.287331	0.528013
D18:0-20:3	818.625	2.06656	1.08225	1.6149	P18:0-22:4/P20:0-20:4/P18:1-22:3	778.575	2.57533	2.08553	2.89833				20:4-20:4-18:2-18:1	748.986	0.255393	0.0710235	0.120101
D18:0-20:2/P18:2-22:6	820.641	0.490265	0.527772	0.705079	A20:0-20:4/P18:0-22:3	780.591	2.82461	2.04924	2.528				20:4-20:4-18:1-18:1	749.994	0.271408	0.194203	0.282346
D18:0-20:1/P18:1-22:6	822.656	0.0477518	0.237657	0.0847767	P18:0-22:2	782.606	1.83939	1.02156	1.73818				22:6-18:1-18:1-18:1 20:4-20:3-18:1-18:1	751.002	0.165987	0.107409	0.186725
P18:0-22:6	824.615	0.983207	0.648749	0.967268	D18:2-22:6	786.507	0.933348	0.505754	0.762106				22:6-18:1-18:1-18:0	752.01
A18:0-22:6/P18:0-22:5	826.63	5.42974	1.78596	5.4685	D18:1-22:6	788.523	2.48268	2.6991	2.77029				20:4-20:2-18:1-18:0 20:4-20:1-18:1-18:1	753.017
D18:2-22:6	836.578				D18:0-22:6/D18:1-22:5	790.539	4.96717	5.83371	5.11265				20:4-20:1-18:1-18:0	754.025
D18:1-22:6/D18:2-22:5	838.594	1.06441	1.56606	0.520463	D18:0-22:5/D18:1-22:4	792.554	4.57303	4.42044	4.73341				20:4-20:1-18:0-18:0	755.033
D18:0-22:6	840.609	2.64336	3.03145	1.77968	D20:0-20:4/D18:0-22:4	794.57	4.37317	3.68949	4.26173				22:6-20:4-20:4-16:1 22:6-22:6-18:2-16:1	758.97	0.219675	0.121212	0.161268
D18:0-22:5	842.625	1.68984	2.04706	1.80468	D20:0-20:3/D18:0-22:3	796.586	2.15481	1.33365	1.72589				22:6-20:4-18:2-18:2 22:6-20:4-20:4-16:0 22:6-22:6-18:1-16:1	759.978
D18:0-22:4/D20:0-20:4/D20:2-20:2	844.641	0.322436	1.29276	0.886972									22:6-20:4-18:2-18:1	760.986	0.304516	0.124859	0.178182
D18:0-22:3/D20:0-20:3/D18:2-22:1	846.656	0.14334	0.351882	0.153001									22:6-20:4-18:1-18:1	761.994
D18:0-22:2/D20:0-20:2	848.672	0.642595	0.246373	0.624354									22:6-20:4-18:1-18:0 22:6-20:3-18:1-18:1	763.002
P20:1-22:6	850.63	0.0890092	0.198707	0.309574									22:4-20:4-18:1-18:1 22:6-20:3-18:1-18:0	764.01
P20:1-22:4	854.661	0.325318	0.317424	0.499019									22:4-20:4-18:1-18:0	765.017
P20:0-22:2	860.708												22:6-20:4-20:4-18:3	770.97	0.189789	0.0560726	0.0750533
P20:0-22:1	862.724												22:6-22:6-20:4-16:0 20:4-20:4-20:4-20:4 22:6-20:4-20:4-18:2 22:6-22:6-18:2-18:2	771.978	0.157352	0.055898	0.140772
P21:1-22:6	864.646	0.166307	0.112562	0.125294									22:6-20:4-20:4-18:1	772.986	0.164009	0.0763078	0.159558
P21:1-22:5	866.661	0.122438	0.177134	0.135099									22:6-22:6-18:1-18:1 22:6-20:4-20:3-18:1	773.994	0.373777	0.128625	0.560324
P21:1-22:4	868.677	0.0916566	0.102129	0.093942									O-22:6-22:6-18:0-18:1 O-22:6-20:3-20:4-18:0	782.999	0.654143	0.110564	0.12211
D20:0-22:5/D20:1-22:4	870.656												20:4-20:4-22:6-22:6	795.978	0.907959	0.173251	0.178098
D20:0-22:4/D20:2-22:2	872.672												22:6-22:6-22:6-18:1 22:6-22:6-20:4-20:3	796.986	0.656067	0.122781	0.133315
D20:0-22:3/D20:2-22:1	874.688												20:4-20:3-22:6-22:5 22:6-22:6-22:6-18:0 22:6-22:6-22:5-18:1	797.994	0.490412	0.102854	0.178078
D20:0-22:2/D20:2-22:0	876.703	0.389958	0.161721	0.343015									20:4-22:6-22:6-22:6	807.978	0.537407	0.151454	0.151702
D20:0-22:1	878.719	0.134987	0.0483831	0.157838									20:4-22:6-22:6-22:5	808.986	0.551022	0.152857	0.207849
D20:0-22:0	880.735												22:6-22:6-22:6-22:5	813.017	0.189926	0.137162	0.184556

## Sheet: BV2 vitro
PC					PE					PG			CL
A14:0-16:0	698.568	0.195175	0.586558	0.358755	P16:0-18:2	698.512	4.37058	2.80702	2.7397	A16:0-16:0	707.523		18:1-16:1-16:1-16:1	684.955	1.2218	2.26679	2.05031
D14:0-16:1	710.531	1.91036	4.28534	2.53539	P18:1-16:0/P16:0-18:1	700.528	11.5964	12.7102	10.9524	16:0-16:1	719.486	0.565381	18:1-16:1-16:1-16:0	685.963	1.25057	2.44731	1.05981
D14:0-16:0	712.547	2.17916	3.90813	3.03709	P18:0-16:0/P16:0-18:0	702.544	2.99393	1.75424	1.68557	16:0-16:0	721.502	0.240377	18:1-16:1-16:0-16:0	686.97	1.20844	2.18183	1.16081
P16:0-16:1/P16:1-16:0/P18:1-14:0	722.568	0.0538846	0.231541	0.143525	D16:1-18:2	712.492	4.2154	2.74914	2.65559	16:1-18:2	743.486	0.255698	18:2-18:1-16:1-16:1	698.97	1.55964	1.85909	1.30032
P16:0-16:0/A16:0-16:1	724.583	0.549185	0.990782	0.993106	D16:0-18:2/D16:1-18:1	714.507	7.94227	7.31741	6.97004	16:0-18:2	745.502	1.37404	18:1-18:1-16:1-16:1	699.978	5.05754	6.31099	5.20468
A16:0-16:0	726.599	1.17866	1.82042	1.46191	D16:0-18:1	716.523	17.0496	18.1316	15.9414	16:0-18:1	747.518	3.27403	18:1-18:1-16:0-16:1 18:2-18:1-16:0-16:0 18:2-18:0-16:1-16:0	700.986	3.11408	5.00633	4.10745
D16:1-16:1/D14:1-18:1	736.547	1.2838	1.74276	1.44534	P14:0-22:6	718.481	2.63943	1.08226	1.37526	18:2-18:2	769.502	0.166266	18:1-18:1-16:0-16:0 18:2-18:0-16:0-16:0 18:1-18:0-16:0-16:1	701.994	2.43633	3.57466	3.56356
D16:1-16:0/D14:1-18:0	738.563	9.65742	12.2604	12.703	P16:1-20:4/ P14:0-22:5	720.497	3.03023	0.944842	1.08425	18:1-18:2	771.518	0.491326	20:4-18:2-16:1-16:1	709.963	0.951782	1.0976	0.416901
D16:0-16:0	740.578	1.88855	3.02996	2.99505	P16:0-20:4	722.512	4.00528	2.75712	2.71444	18:1-18:1	773.533	5.06986	20:4-18:1-16:1-16:1 20:4-18:2-16:1-16:0	710.97	0.460211	0.507462	0.57719
P16:0-18:2/A16:0-18:3	748.583	0.0823017	0.194303	0.0705167	P16:0-20:3/P18:1-18:2	724.528	2.92736	2.1529	2.09356	18:0-18:1	775.549	1.52968	20:4-18:1-16:1-16:0 18:2-18:2-18:1-16:1	711.978	1.19601	1.50312	1.11655
P16:0-18:1/P18:1-16:0	750.599	0.538693	0.91852	0.743379	P18:1-18:1/P18:0-18:2/P16:0-20:2	726.544	7.68724	8.69623	7.6648				18:2-18:1-18:1-16:1 18:1-18:1-18:1-16:2 18:2-18:1-18:0-16:2 18:2-18:2-18:0-16:1	712.986	4.98841	6.52647	5.56727
P16:0-18:0/P18:0-16:0/A18:1-16:0/A16:0-18:1	752.615	2.57809	3.69028	3.68662	P18:0-18:1/P16:0-20:1	728.559	7.65153	8.15514	7.21545				18:1-18:1-18:1-16:1 18:2-18:1-18:1-16:0	713.994	7.5344	10.2135	7.64061
D14:1-20:3/D16:2-18:2/D14:0-20:4	760.547	0.440409	0.515885	0.483814	A18:0-18:1	730.575	7.13531	7.51538	6.33047				18:1-18:1-18:1-16:0 18:0-18:1-18:1-16:1	715.002	3.31251	5.24428	4.01751
D16:1-18:2	762.563	0.711454	0.60131	0.443486	D14:1-22:6	732.46	3.0847	1.49333	1.52291				18:0-18:1-18:1-16:0 18:0-18:0-18:1-16:1	716.01	0.887777	1.34711	1.17884
D16:0-18:2	764.578	9.30756	11.6116	10.5243	D16:2-20:4/D14:1-22:5	734.476	1.67522	0.587342	0.806218				O-20:4-18:1-16:1-16:0 O-18:2-18:2-18:1-16:1	719.976	0.80836	1.50981	1.17094
D16:0-18:1	766.594	22.9725	35.272	33.0093	D16:1-20:4	736.492	3.17185	1.30192	1.46255				O-18:2-18:1-18:1-16:1 O-18:1-18:1-18:1-16:2 O-18:2-18:1-18:0-16:2 O-18:2-18:2-18:0-16:1	720.984	0.97322	1.36929	0.883329
D16:0-18:0	768.609	2.16522	2.53413	3.42999	D16:0-20:4/D18:2-18:2	738.507	4.0871	3.69261	3.26705				20:4-20:4-16:1-16:1	721.963	1.16365	1.20662	0.710539
P16:0-20:4/P20:4-16:0/P18:2-18:2	772.583	0.253182	0.571358	0.287989	D18:1-18:2/D16:0-20:3	740.523	3.32381	2.69883	2.55696				20:4-20:4-16:1-16:0 20:4-18:2-18:2-16:1	722.97	0.8286	1.05721	0.538676
A16:0-20:4	774.599	0.172681	0.229813	0.365677	D18:0-18:2/D18:1-18:1/D16:0-20:2	742.539	17.3113	21.8341	18.601				20:4-18:2-18:1-16:1	723.978	0.732794	0.806102	0.612304
P18:1-18:1	776.615	0.351744	0.520294	0.518152	D18:0-18:1/D16:0-20:1	744.554	32.1146	32.7295	28.1724				20:4-18:2-18:1-16:0 20:4-18:1-18:1-16:1	724.986	1.19949	1.22116	1.04782
P18:0-18:1/P18:1-18:0	778.63	2.10637	2.61646	3.43419	P16:0-22:6/D18:0-18:0/P18:2-20:4	746.512	3.59236	3.07667	2.89679				20:4-18:1-18:1-16:0 20:3-18:1-18:1-16:1 20:3-18:1-18:1-16:1	725.994	2.42342	3.21349	2.56784
A18:0-18:1/P18:0-18:0	780.646	5.47849	6.81498	8.23989	P18:1-20:4/P16:0-22:5	748.528	7.48828	5.18207	5.82063				18:2-18:1-18:1-18:1	727.002	3.65748	4.85455	3.99465
A16:0-20:0	782.661	12.3452	17.2806	22.5997	P18:0-20:4/P16:0-22:4/P18:1-20:3	750.544	3.51931	2.59213	2.64917				18:1-18:1-18:1-18:1	728.01	2.7784	3.66671	2.93055
D18:2-18:3/D16:1-20:4	786.563	0.833181	0.964876	0.287434	P18:0-20:3	752.559	1.9926	1.56875	1.45351				18:1-18:1-18:1-18:0	729.017	0.783841	0.817892	0.664855
D18:2-18:2/D16:0-20:4	788.578	2.33937	2.9896	3.46991	P20:1-18:1/P18:1-20:1	754.575	2.0546	1.62288	1.51807				O-20:4-20:4-16:1-16:0 O-20:4-18:2-18:2-16:1	730.968	0.952799	0.682871	0.525863
D18:1-18:2/D16:0-20:3	790.594	2.30853	2.84549	2.10597	P18:1-20:0	756.591	2.46156	2.19437	1.85597				O-20:4-18:2-18:1-16:1	731.976	0.767105	0.629241	0.426766
D18:0-18:2/D18:1-18:1	792.609	23.8719	33.2044	32.2033	P20:0-18:0/P18:0-20:0	758.476	3.9892	2.60868	2.63342				22:6-20:4-16:1-16:1	733.963	0.406865	0.60921	0.366955
D18:0-18:1	794.625	6.99857	11.5354	12.48	D16:1-22:6	760.492	4.43295	3.06406	2.62124				20:4-20:4-18:2-16:1	734.97	0.42282	0.505061	0.332403
D18:0-18:0	796.641	0.92916	1.42622	1.92158	D16:0-22:6	762.507	4.2797	3.76817	3.19393				20:4-20:4-18:1-16:1	735.978	0.638011	0.787218	0.383383
P18:1-20:4	798.599	0.428073	0.95242	0.717165	D18:1-20:4/D16:0-22:5	764.523	8.63195	7.93553	6.61138				20:4-20:4-18:1-16:0 22:6-18:1-18:1-16:1 22:6-18:2-18:1-16:0	736.986	0.671374	0.819504	0.595204
P18:0-20:4	800.615	0.47023	0.950096	0.38489	D18:1-20:3/D18:0-20:4/D16:0-22:4	766.539	11.752	13.4203	10.5941				20:4-18:2-18:1-18:1 22:6-18:1-18:1-16:0	737.994	0.911617	1.34756	0.721988
P18:2-20:1/P20:1-18:2/A18:0-20:4	802.63	0.373867	0.66827	0.294808	D18:0-20:3/D18:1-20:2/D16:0-22:3	768.554	3.60706	3.28806	2.85014				20:4-18:1-18:1-18:1	739.002	0.86932	0.943535	0.642782
A18:0-20:0	810.693	3.22935	5.22048	7.67959	P18:2-22:6/D18:1-20:1	770.512	2.74195	2.42933	2.01137				20:4-18:1-18:1-18:0 20:3-18:1-18:1-18:1	740.01	0.823878	0.611285	0.521552
D16:0-22:6/D18:2-20:4	812.578	1.60994	2.62618	0	P18:1-22:6/D18:0-20:1	772.528	3.61226	3.00813	2.54858				20:4-18:1-18:0-18:0 20:3-18:1-18:1-18:0	741.017	0.382451	0.471242	0.287271
D18:1-20:4/D16:0-22:5	814.594	2.78993	3.7818	3.24133	P18:0-22:6/P18:1-22:5/D18:0-20:0	774.544	7.79312	5.90635	5.64143				22:6-18:3-18:2-18:2	746.97	1.13841	2.99247	1.73938
D18:2-20:2/D18:0-20:4	816.609	1.28843	2.11232	1.11106	P18:0-22:5/P18:1-22:4	776.559	4.23559	2.76272	3.18001				20:4-20:4-18:2-18:2 20:4-20:4-20:4-16:0 22:6-20:4-18:1-16:1 22:6-22:6-16:0-16:0 22:6-18:2-18:2-18:2	747.978	3.12638	3.12725	1.93006
D18:0-20:3	818.625	0.413521	0.645468	0.577313	P18:0-22:4/P20:0-20:4/P18:1-22:3	778.575	2.12019	1.28249	1.22614				20:4-20:4-18:2-18:1	748.986	0.804051	0.975609	0.377144
D18:0-20:2/P18:2-22:6	820.641	1.35004	2.16155	2.40978	A20:0-20:4/P18:0-22:3	780.591	2.25113	1.37671	1.28388				20:4-20:4-18:1-18:1	749.994	0.991427	1.13207	0.454814
D18:0-20:1/P18:1-22:6	822.656	0.271954	0.476454	0.692091	P18:0-22:2	782.606	1.81174	1.38062	1.16534				22:6-18:1-18:1-18:1 20:4-20:3-18:1-18:1	751.002	0.727051	1.77478	0.669335
P18:0-22:6	824.615	0.239359	0.765375	0.181016	D18:2-22:6	786.507	3.58297	2.89655	2.46421				22:6-18:1-18:1-18:0	752.01	1.53004	0.859113	0.539465
A18:0-22:6/P18:0-22:5	826.63	0.310115	0.996581	1.02256	D18:1-22:6	788.523	7.36434	6.86	5.74553				20:4-20:2-18:1-18:0 20:4-20:1-18:1-18:1	753.017	0.784801	0.551898	0.41056
D18:2-22:6	836.578	0.308285	1.54671	0	D18:0-22:6/D18:1-22:5	790.539	10.9884	12.2318	9.52807				20:4-20:1-18:1-18:0	754.025	0.765085	0.423021	0.316819
D18:1-22:6/D18:2-22:5	838.594	1.04308	2.32801	0	D18:0-22:5/D18:1-22:4	792.554	8.9282	7.68422	6.28891				20:4-20:1-18:0-18:0	755.033	0.445892	0.290914	0.178322
D18:0-22:6	840.609	0.833705	1.52124	0.536498	D20:0-20:4/D18:0-22:4	794.57	6.73872	3.80532	3.29769				22:6-20:4-20:4-16:1 22:6-22:6-18:2-16:1	758.97	0.97301	0.76662	0.404461
D18:0-22:5	842.625	0.387502	0.794916	0.878953	D20:0-20:3/D18:0-22:3	796.586	2.60726	1.351	1.3152				22:6-20:4-18:2-18:2 22:6-20:4-20:4-16:0 22:6-22:6-18:1-16:1	759.978	0.736345	0.785575	0.449506
D18:0-22:4/D20:0-20:4/D20:2-20:2	844.641	0.123054	0.287202	0.181082	D20:0-20:2/D18:0-22:2	798.601	1.90979	1.04375	1.0824				22:6-20:4-18:2-18:1	760.986	0.345923	0.621699	0.37105
D18:0-22:3/D20:0-20:3/D18:2-22:1	846.656	0.0740846	0.227915	0.263258									22:6-20:4-18:1-18:1	761.994	0.825561	1.02506	0.465493
D18:0-22:2/D20:0-20:2	848.672	0.186275	0.314575	0.2434									22:6-20:4-18:1-18:0 22:6-20:3-18:1-18:1	763.002	0.446177	0.41466	0.144489
P20:1-22:6	850.63	0.00803057	0.0833257	0									22:4-20:4-18:1-18:1 22:6-20:3-18:1-18:0	764.01	0.68797	0.778905	0.335819
P20:1-22:4	854.661	0.299304	0.870594	0.682077									22:4-20:4-18:1-18:0	765.017	1.11397	0.858645	0.363007
P20:0-22:2	860.708	0.0658358	0.176402	0.189232									22:6-20:4-20:4-18:3	770.97	0.593783	0.64373	0.389906
P20:0-22:1	862.724	0.100329	0.176116	0.457609									22:6-22:6-20:4-16:0 20:4-20:4-20:4-20:4 22:6-20:4-20:4-18:2 22:6-22:6-18:2-18:2	771.978	0.766633	1.10494	0.493836
P21:1-22:6	864.646	0.0176608	0.18962	0.0623745									22:6-20:4-20:4-18:1	772.986	1.97367	5.04579	2.82648
P21:1-22:5	866.661	0.0427124	0.123169	0.337158									22:6-22:6-18:1-18:1 22:6-20:4-20:3-18:1	773.994	4.31093	5.33949	3.65073
P21:1-22:4	868.677	0.0362459	0.133392	0.166817									20:4-20:4-22:6-22:6	795.978
D20:0-22:5/D20:1-22:4	870.656	0.0458466	0.0840579	0.064528									22:6-22:6-22:6-18:1 22:6-22:6-20:4-20:3	796.986
D20:0-22:4/D20:2-22:2	872.672	0.0134069	0.0473152	0.0597211									20:4-20:3-22:6-22:5 22:6-22:6-22:6-18:0 22:6-22:6-22:5-18:1	797.994
D20:0-22:3/D20:2-22:1	874.688	0.0365608	0.0845896	0.113693									20:4-22:6-22:6-22:6	807.978
D20:0-22:2/D20:2-22:0	876.703	0.0737619	0.171701	0.145021									22:6-22:6-22:6-22:5	813.017
D20:0-22:1	878.719	0.0410963	0.150206	0.103769
D20:0-22:0	880.735	0.0102328	0.0664571	0.0611412

## Sheet: CT2A vitro
PC					PE					PG			CL
A14:0-16:0	698.568	0.470057	0.446576	0.581181	P16:0-18:2	698.512	4.13939	3.73737	5.44397	A16:0-16:0	707.523	2.41401	18:1-16:1-16:1-16:1	684.955	0.184919	0.280471	0.403836
D14:0-16:1	710.531	5.92033	4.70364	5.985	P18:1-16:0/P16:0-18:1	700.528	10.3819	7.9978	7.8777	16:0-16:1	719.486	0.396728	18:1-16:1-16:1-16:0	685.963	0.599899	0.937001	0.665102
D14:0-16:0	712.547	5.01849	5.96802	7.28726	P18:0-16:0/P16:0-18:0	702.544	2.26253	3.10297	3.073	16:0-16:0	721.502	0.495039	18:1-16:1-16:0-16:0	686.97	0.768139	0.710404	0.667721
P16:0-16:1/P16:1-16:0/P18:1-14:0	722.568	0.180643	0.157285	0.162966	D16:1-18:2	712.492	1.42155	2.10674	1.59146	16:1-18:2	743.486	0.14301	18:2-18:1-16:1-16:1	698.97	0.602233	1.45821	0.861614
P16:0-16:0/A16:0-16:1	724.583	1.18315	1.40475	1.65178	D16:0-18:2/D16:1-18:1	714.507	3.23599	2.7121	2.78778	16:0-18:2	745.502	0.521082	18:1-18:1-16:1-16:1	699.978	2.13757	2.5985	1.64005
A16:0-16:0	726.599	1.67222	1.45277	1.78782	D16:0-18:1	716.523	4.28767	5.85378	4.6061	16:0-18:1	747.518	1.8239	18:1-18:1-16:0-16:1 18:2-18:1-16:0-16:0 18:2-18:0-16:1-16:0	700.986	1.01895	1.0654	1.06439
D16:1-16:1/D14:1-18:1	736.547	0.934568	0.675495	0.747823	P14:0-22:6	718.481	0.818596	0.893353	0.968886	18:2-18:2	769.502	0.162502	18:1-18:1-16:0-16:0 18:2-18:0-16:0-16:0 18:1-18:0-16:0-16:1	701.994	0.54308	0.676509	0.547749
D16:1-16:0/D14:1-18:0	738.563	9.96645	12.9548	12.9395	P16:1-20:4/ P14:0-22:5	720.497	1.54505	1.72954	1.94434	18:1-18:2	771.518	0.234615	20:4-18:2-16:1-16:1	709.963	0.140738	0.127082	0.0796667
D16:0-16:0	740.578	6.08386	5.86967	7.71626	P16:0-20:4	722.512	7.25896	5.64985	6.38711	18:1-18:1	773.533	0.884442	20:4-18:1-16:1-16:1 20:4-18:2-16:1-16:0	710.97	0.217838	0.415875	0.295765
P16:0-18:2/A16:0-18:3	748.583	0.0790103	0.0684057	0.0601543	P16:0-20:3/P18:1-18:2	724.528	5.0278	3.69121	3.84567	18:0-18:1	775.549	0.468752	20:4-18:1-16:1-16:0 18:2-18:2-18:1-16:1	711.978	0.504091	1.24403	0.768421
P16:0-18:1/P18:1-16:0	750.599	0.592759	0.679348	0.636515	P18:1-18:1/P18:0-18:2/P16:0-20:2	726.544	7.84195	5.13497	5.5312				18:2-18:1-18:1-16:1 18:1-18:1-18:1-16:2 18:2-18:1-18:0-16:2 18:2-18:2-18:0-16:1	712.986	1.76981	3.01202	1.98946
P16:0-18:0/P18:0-16:0/A18:1-16:0/A16:0-18:1	752.615	2.37252	2.48994	2.58728	P18:0-18:1/P16:0-20:1	728.559	6.94413	5.28702	5.33541				18:1-18:1-18:1-16:1 18:2-18:1-18:1-16:0	713.994	2.56884	2.48813	1.91508
D14:1-20:3/D16:2-18:2/D14:0-20:4	760.547	0.108001	0	0	A18:0-18:1	730.575	4.14195	4.50591	4.28905				18:1-18:1-18:1-16:0 18:0-18:1-18:1-16:1	715.002	0.701513	0.621547	0.583175
D16:1-18:2	762.563	0.267407	0.165931	0.175906	D14:1-22:6	732.46	0.767546	0.831415	0.771611				18:0-18:1-18:1-16:0 18:0-18:0-18:1-16:1	716.01	0.22196	0.225602	0.178763
D16:0-18:2	764.578	4.26793	4.2806	4.23541	D16:2-20:4/D14:1-22:5	734.476	0.851674	0.661947	1.39837				O-20:4-18:1-16:1-16:0 O-18:2-18:2-18:1-16:1	719.976	0.22784	0.408304	0.239555
D16:0-18:1	766.594	19.0833	26.0188	24.5193	D16:1-20:4	736.492	1.34937	1.09169	1.44282				O-18:2-18:1-18:1-16:1 O-18:1-18:1-18:1-16:2 O-18:2-18:1-18:0-16:2 O-18:2-18:2-18:0-16:1	720.984	0.403141	0.35327	0.368422
D16:0-18:0	768.609	1.72792	1.83905	2.07193	D16:0-20:4/D18:2-18:2	738.507	1.75402	2.02098	1.8594				20:4-20:4-16:1-16:1	721.963	0.152221	0.19814	0.327644
P16:0-20:4/P20:4-16:0/P18:2-18:2	772.583	1.10888	0.512302	0.551052	D18:1-18:2/D16:0-20:3	740.523	1.24888	1.49411	1.29043				20:4-20:4-16:1-16:0 20:4-18:2-18:2-16:1	722.97	0.196252	0.249095	0.196228
A16:0-20:4	774.599	0.12941	0.070035	0.063497	D18:0-18:2/D18:1-18:1/D16:0-20:2	742.539	4.18457	4.87244	4.59759				20:4-18:2-18:1-16:1	723.978	0.338138	0.471003	0.273404
P18:1-18:1	776.615	0.252011	0.338487	0.403544	D18:0-18:1/D16:0-20:1	744.554	11.3721	9.5278	9.46423				20:4-18:2-18:1-16:0 20:4-18:1-18:1-16:1	724.986	0.467885	1.00429	0.641063
P18:0-18:1/P18:1-18:0	778.63	1.06127	1.2591	1.3637	P16:0-22:6/D18:0-18:0/P18:2-20:4	746.512	5.66438	4.5725	5.54912				20:4-18:1-18:1-16:0 20:3-18:1-18:1-16:1 20:3-18:1-18:1-16:1	725.994	0.887067	1.81451	1.14269
A18:0-18:1/P18:0-18:0	780.646	1.87712	2.40098	2.2447	P18:1-20:4/P16:0-22:5	748.528	12.1618	11.2748	13.3155				18:2-18:1-18:1-18:1	727.002	1.29736	1.67986	1.20552
A16:0-20:0	782.661	4.45861	5.56061	5.03008	P18:0-20:4/P16:0-22:4/P18:1-20:3	750.544	7.29746	5.69166	5.88536				18:1-18:1-18:1-18:1	728.01	0.887991	0.693266	0.57078
D18:2-18:3/D16:1-20:4	786.563	0.175721	0	0	P18:0-20:3	752.559	4.38939	3.25059	3.34821				18:1-18:1-18:1-18:0	729.017	0.243436	0.263098	0.196336
D18:2-18:2/D16:0-20:4	788.578	0.727133	0.534849	0.486858	P20:1-18:1/P18:1-20:1	754.575	2.81315	1.76721	2.2539				O-20:4-20:4-16:1-16:0 O-20:4-18:2-18:2-16:1	730.968	0.196523	0.224017	0.225942
D18:1-18:2/D16:0-20:3	790.594	1.44485	1.43984	1.44392	P18:1-20:0	756.591	1.77708	1.26771	1.4069				O-20:4-18:2-18:1-16:1	731.976	0.116321	0.126219	0.107753
D18:0-18:2/D18:1-18:1	792.609	11.5291	14.4423	14.7294	P20:0-18:0/P18:0-20:0	758.476	1.85946	1.3157	1.51296				22:6-20:4-16:1-16:1	733.963	0.119612	0.121898	0.223147
D18:0-18:1	794.625	6.92834	15.3152	12.9714	D16:1-22:6	760.492	1.33895	1.21413	0.991391				20:4-20:4-18:2-16:1	734.97	0.154047	0.153713	0.146247
D18:0-18:0	796.641	0.502082	0.714208	0.809185	D16:0-22:6	762.507	0.965384	1.48307	1.33646				20:4-20:4-18:1-16:1	735.978	0.137506	0.219546	0.194812
P18:1-20:4	798.599	1.13272	0.695176	0.736358	D18:1-20:4/D16:0-22:5	764.523	1.76073	2.71733	2.43712				20:4-20:4-18:1-16:0 22:6-18:1-18:1-16:1 22:6-18:2-18:1-16:0	736.986	0.29709	0.394292	0.288658
P18:0-20:4	800.615	4.54951	4.68388	4.90698	D18:1-20:3/D18:0-20:4/D16:0-22:4	766.539	4.96313	8.15228	6.35145				20:4-18:2-18:1-18:1 22:6-18:1-18:1-16:0	737.994	0.317793	0.544911	0.349081
P18:2-20:1/P20:1-18:2/A18:0-20:4	802.63	0.237182	0.214614	0.320536	D18:0-20:3/D18:1-20:2/D16:0-22:3	768.554	6.33763	7.14952	8.43279				20:4-18:1-18:1-18:1	739.002	0.344933	0.607948	0.363709
A18:0-20:0	810.693	1.95527	1.20085	1.00173	P18:2-22:6/D18:1-20:1	770.512	1.36796	1.17917	1.31645				20:4-18:1-18:1-18:0 20:3-18:1-18:1-18:1	740.01	0.356031	0.407772	0.32321
D16:0-22:6/D18:2-20:4	812.578	0.762999	0.279748	0	P18:1-22:6/D18:0-20:1	772.528	3.0733	2.0793	2.43816				20:4-18:1-18:0-18:0 20:3-18:1-18:1-18:0	741.017	0.137267	0.159316	0.126841
D18:1-20:4/D16:0-22:5	814.594	0.819053	0.884509	0.839791	P18:0-22:6/P18:1-22:5/D18:0-20:0	774.544	5.65965	4.2068	5.01948				22:6-18:3-18:2-18:2	746.97	0.105054	0.129962	0.115782
D18:2-20:2/D18:0-20:4	816.609	1.87838	2.08909	2.18334	P18:0-22:5/P18:1-22:4	776.559	3.96232	3.79653	4.17112				20:4-20:4-18:2-18:2 20:4-20:4-20:4-16:0 22:6-20:4-18:1-16:1 22:6-22:6-16:0-16:0 22:6-18:2-18:2-18:2	747.978	0.297494	0.352104	0.289483
D18:0-20:3	818.625	1.84886	1.89296	2.21102	P18:0-22:4/P20:0-20:4/P18:1-22:3	778.575	2.46244	2.03118	2.37714				20:4-20:4-18:2-18:1	748.986	0.0932391	0.126005	0.116832
D18:0-20:2/P18:2-22:6	820.641	1.69853	2.08739	1.89498	A20:0-20:4/P18:0-22:3	780.591	3.4073	2.21612	2.97601				20:4-20:4-18:1-18:1	749.994	0.287638	0.311086	0.23195
D18:0-20:1/P18:1-22:6	822.656	0	0.245948	0	P18:0-22:2	782.606	2.4023	1.78947	2.54071				22:6-18:1-18:1-18:1 20:4-20:3-18:1-18:1	751.002	0.20862	0.240624	0.193466
P18:0-22:6	824.615	0.415302	0.375126	0.530075	D18:2-22:6	786.507	1.38008	1.06058	0.817554				22:6-18:1-18:1-18:0	752.01
A18:0-22:6/P18:0-22:5	826.63	3.0221	3.05538	4.02359	D18:1-22:6	788.523	2.2942	2.22037	1.80715				20:4-20:2-18:1-18:0 20:4-20:1-18:1-18:1	753.017
D18:2-22:6	836.578				D18:0-22:6/D18:1-22:5	790.539	2.26147	4.07776	3.05857				20:4-20:1-18:1-18:0	754.025
D18:1-22:6/D18:2-22:5	838.594	0.429375	0.426605	0.431722	D18:0-22:5/D18:1-22:4	792.554	2.95328	3.38051	3.25567				20:4-20:1-18:0-18:0	755.033
D18:0-22:6	840.609	0.889479	1.1781	0.949856	D20:0-20:4/D18:0-22:4	794.57	4.504	4.10044	4.1076				22:6-20:4-20:4-16:1 22:6-22:6-18:2-16:1	758.97	0.225693	0.128797	0.158964
D18:0-22:5	842.625	0.608219	0.967668	0.840333	D20:0-20:3/D18:0-22:3	796.586	1.60111	1.5177	1.79838				22:6-20:4-18:2-18:2 22:6-20:4-20:4-16:0 22:6-22:6-18:1-16:1	759.978
D18:0-22:4/D20:0-20:4/D20:2-20:2	844.641	0.376296	0.612844	0.719746									22:6-20:4-18:2-18:1	760.986	0.200009	0.136063	0.178032
D18:0-22:3/D20:0-20:3/D18:2-22:1	846.656	0.218183	0.0908762	0.0506943									22:6-20:4-18:1-18:1	761.994
D18:0-22:2/D20:0-20:2	848.672	0.222047	0.171458	0.149542									22:6-20:4-18:1-18:0 22:6-20:3-18:1-18:1	763.002
P20:1-22:6	850.63	0.0820625	0.214274	0.350317									22:4-20:4-18:1-18:1 22:6-20:3-18:1-18:0	764.01
P20:1-22:4	854.661	0.418706	0.260786	0.361389									22:4-20:4-18:1-18:0	765.017
P20:0-22:2	860.708												22:6-20:4-20:4-18:3	770.97	0.0880863	0.0587208	0.0738145
P20:0-22:1	862.724												22:6-22:6-20:4-16:0 20:4-20:4-20:4-20:4 22:6-20:4-20:4-18:2 22:6-22:6-18:2-18:2	771.978	0.115246	0.0723881	0.0753745
P21:1-22:6	864.646	0.0892545	0.0606579	0.0611485									22:6-20:4-20:4-18:1	772.986	0.157593	0.0886166	0.0739609
P21:1-22:5	866.661	0.133736	0.0768063	0.0707606									22:6-22:6-18:1-18:1 22:6-20:4-20:3-18:1	773.994	0.269881	0.166599	0.16071
P21:1-22:4	868.677	0.0655302	0.0743018	0.120459									O-22:6-22:6-18:0-18:1 O-22:6-20:3-20:4-18:0	782.999	0.26631	0.158224	0.201825
D20:0-22:5/D20:1-22:4	870.656												20:4-20:4-22:6-22:6	795.978	0.13527	0.128737	0.164747
D20:0-22:4/D20:2-22:2	872.672												22:6-22:6-22:6-18:1 22:6-22:6-20:4-20:3	796.986	0.133856	0.129819	0.15894
D20:0-22:3/D20:2-22:1	874.688												20:4-20:3-22:6-22:5 22:6-22:6-22:6-18:0 22:6-22:6-22:5-18:1	797.994	0.125002	0.0932173	0.120752
D20:0-22:2/D20:2-22:0	876.703	0.124369	0.101559	0.137536									20:4-22:6-22:6-22:6	807.978	0.273433	0.153535	0.218439
D20:0-22:1	878.719	0.0609799	0.0554076	0.0940778									20:4-22:6-22:6-22:5	808.986	0.36594	0.189528	0.246921
D20:0-22:0	880.735												22:6-22:6-22:6-22:5	813.017	0.191676	0.180817	0.180262

## Sheet: EPEN vitro
PC					PE					PG			CL
A14:0-16:0	698.568	0.0832245	0.131313	0.104491	P16:0-18:2	698.512	3.42157	3.26123	3.25545	A16:0-16:0	707.523	0.364766	18:1-16:1-16:1-16:1	684.955	0.885706	0.60645	1.08972
D14:0-16:1	710.531	5.65801	4.41841	5.33594	P18:1-16:0/P16:0-18:1	700.528	7.01122	5.24944	4.84232	16:0-16:1	719.486	0.30099	18:1-16:1-16:1-16:0	685.963	0.247003	0.177849	0.293408
D14:0-16:0	712.547	4.47873	4.29972	4.78616	P18:0-16:0/P16:0-18:0	702.544	4.19966	2.4414	2.14632	16:0-16:0	721.502	0.862344	18:1-16:1-16:0-16:0	686.97	0.494773	0.451848	0.507667
P16:0-16:1/P16:1-16:0/P18:1-14:0	722.568	0.123025	0.0554281	0.0949038	D16:1-18:2	712.492	1.8042	1.50652	1.48738	16:1-18:2	743.486	0.144834	18:2-18:1-16:1-16:1	698.97	0.414362	0.354826	0.499413
P16:0-16:0/A16:0-16:1	724.583	0.552864	0.314818	0.492693	D16:0-18:2/D16:1-18:1	714.507	2.72886	2.46272	2.51728	16:0-18:2	745.502	0.436953	18:1-18:1-16:1-16:1	699.978	0.978093	0.913805	1.07591
A16:0-16:0	726.599	1.09846	1.00753	1.32599	D16:0-18:1	716.523	4.08185	4.99297	4.70166	16:0-18:1	747.518	1.20866	18:1-18:1-16:0-16:1 18:2-18:1-16:0-16:0 18:2-18:0-16:1-16:0	700.986	0.970772	1.04187	1.13175
D16:1-16:1/D14:1-18:1	736.547	0.700621	0.713966	0.631589	P14:0-22:6	718.481	1.84065	1.81268	1.6017	18:2-18:2	769.502	0.268451	18:1-18:1-16:0-16:0 18:2-18:0-16:0-16:0 18:1-18:0-16:0-16:1	701.994	0.835118	0.966973	1.0681
D16:1-16:0/D14:1-18:0	738.563	7.89527	8.65792	9.01056	P16:1-20:4/ P14:0-22:5	720.497	4.88185	4.62023	5.02809	18:1-18:2	771.518	0.266421	20:4-18:2-16:1-16:1	709.963	0.200201	0.145376	0.144181
D16:0-16:0	740.578	9.82811	11.8901	13.2791	P16:0-20:4	722.512	19.9811	15.3996	15.1293	18:1-18:1	773.533	0.537069	20:4-18:1-16:1-16:1 20:4-18:2-16:1-16:0	710.97	0.305861	0.291248	0.315696
P16:0-18:2/A16:0-18:3	748.583	0.0167726	0.0233362	0.0442679	P16:0-20:3/P18:1-18:2	724.528	3.16343	2.52919	2.80872	18:0-18:1	775.549	0.333969	20:4-18:1-16:1-16:0 18:2-18:2-18:1-16:1	711.978	0.675466	0.583611	0.694022
P16:0-18:1/P18:1-16:0	750.599	0.211143	0.192584	0.162101	P18:1-18:1/P18:0-18:2/P16:0-20:2	726.544	4.05384	2.83669	3.01413				18:2-18:1-18:1-16:1 18:1-18:1-18:1-16:2 18:2-18:1-18:0-16:2 18:2-18:2-18:0-16:1	712.986	1.92584	1.72911	2.09255
P16:0-18:0/P18:0-16:0/A18:1-16:0/A16:0-18:1	752.615	1.28884	1.34133	1.25037	P18:0-18:1/P16:0-20:1	728.559	3.39218	2.79836	2.30043				18:1-18:1-18:1-16:1 18:2-18:1-18:1-16:0	713.994	2.70598	1.97169	2.46301
D14:1-20:3/D16:2-18:2/D14:0-20:4	760.547	0	0.0313782	0	A18:0-18:1	730.575	4.3687	3.41695	2.97248				18:1-18:1-18:1-16:0 18:0-18:1-18:1-16:1	715.002	1.47105	1.2339	1.27896
D16:1-18:2	762.563	0.218796	0.260226	0.16519	D14:1-22:6	732.46	1.2981	1.13045	0.833981				18:0-18:1-18:1-16:0 18:0-18:0-18:1-16:1	716.01	0.195142	0.226272	0.287972
D16:0-18:2	764.578	3.02339	3.38408	3.18833	D16:2-20:4/D14:1-22:5	734.476	1.2026	1.12218	0.960454				O-20:4-18:1-16:1-16:0 O-18:2-18:2-18:1-16:1	719.976	0.382843	0.302341	0.312713
D16:0-18:1	766.594	32.4355	28.4773	31.5526	D16:1-20:4	736.492	2.06143	1.9062	1.73449				O-18:2-18:1-18:1-16:1 O-18:1-18:1-18:1-16:2 O-18:2-18:1-18:0-16:2 O-18:2-18:2-18:0-16:1	720.984	0.60294	0.440426	0.512063
D16:0-18:0	768.609	2.39733	2.01391	2.36553	D16:0-20:4/D18:2-18:2	738.507	3.05904	3.06565	2.99483				20:4-20:4-16:1-16:1	721.963	0.255293	0.334787	0.340802
P16:0-20:4/P20:4-16:0/P18:2-18:2	772.583	0.312275	0.255134	0.244319	D18:1-18:2/D16:0-20:3	740.523	1.04916	1.23125	0.875592				20:4-20:4-16:1-16:0 20:4-18:2-18:2-16:1	722.97	0.283031	0.200479	0.303174
A16:0-20:4	774.599	0.168107	0.132692	0.128024	D18:0-18:2/D18:1-18:1/D16:0-20:2	742.539	3.07654	4.30538	4.00986				20:4-18:2-18:1-16:1	723.978	0.650217	0.547342	0.600953
P18:1-18:1	776.615	0.130133	0.142272	0.171521	D18:0-18:1/D16:0-20:1	744.554	11.4781	11.0358	10.4276				20:4-18:2-18:1-16:0 20:4-18:1-18:1-16:1	724.986	1.28457	0.966727	1.08944
P18:0-18:1/P18:1-18:0	778.63	0.757936	0.812031	0.904745	P16:0-22:6/D18:0-18:0/P18:2-20:4	746.512	8.89037	8.13967	7.88706				20:4-18:1-18:1-16:0 20:3-18:1-18:1-16:1 20:3-18:1-18:1-16:1	725.994	2.09804	1.63537	1.88014
A18:0-18:1/P18:0-18:0	780.646	2.08644	1.59802	1.84799	P18:1-20:4/P16:0-22:5	748.528	23.0494	19.9207	18.3068				18:2-18:1-18:1-18:1	727.002	2.74811	1.75672	2.33143
A16:0-20:0	782.661	6.16617	4.61368	5.40304	P18:0-20:4/P16:0-22:4/P18:1-20:3	750.544	14.9102	11.3112	11.0429				18:1-18:1-18:1-18:1	728.01	1.83523	0.862209	1.24942
D18:2-18:3/D16:1-20:4	786.563	0.703207	0.705144	0.814438	P18:0-20:3	752.559	2.84816	2.29205	2.23396				18:1-18:1-18:1-18:0	729.017	0.293442	0.269858	0.28793
D18:2-18:2/D16:0-20:4	788.578	13.8624	9.61148	10.4595	P20:1-18:1/P18:1-20:1	754.575	1.07295	0.941391	0.961523				O-20:4-20:4-16:1-16:0 O-20:4-18:2-18:2-16:1	730.968	0.317045	0.308717	0.268141
D18:1-18:2/D16:0-20:3	790.594	2.68942	2.53655	2.76754	P18:1-20:0	756.591	1.02427	0.894571	0.664987				O-20:4-18:2-18:1-16:1	731.976	0.184883	0.162232	0.193615
D18:0-18:2/D18:1-18:1	792.609	10.5129	10.0924	12.065	P20:0-18:0/P18:0-20:0	758.476	1.40224	1.20058	0.945837				22:6-20:4-16:1-16:1	733.963	0.145797	0.131894	0.147618
D18:0-18:1	794.625	16.6396	12.9384	15.4313	D16:1-22:6	760.492	1.04704	1.3377	0.963652				20:4-20:4-18:2-16:1	734.97	0.320895	0.246515	0.254817
D18:0-18:0	796.641	0.824475	0.727699	0.498809	D16:0-22:6	762.507	2.91618	2.97932	2.63274				20:4-20:4-18:1-16:1	735.978	0.296605	0.255993	0.281887
P18:1-20:4	798.599	0.483195	0.283712	0.448715	D18:1-20:4/D16:0-22:5	764.523	3.91966	4.6436	4.47629				20:4-20:4-18:1-16:0 22:6-18:1-18:1-16:1 22:6-18:2-18:1-16:0	736.986	0.939474	0.694886	0.706306
P18:0-20:4	800.615	1.18033	0.731092	0.891433	D18:1-20:3/D18:0-20:4/D16:0-22:4	766.539	24.1666	20.9287	23.5086				20:4-18:2-18:1-18:1 22:6-18:1-18:1-16:0	737.994	1.12161	0.756905	0.915052
P18:2-20:1/P20:1-18:2/A18:0-20:4	802.63	1.4244	1.2395	1.51616	D18:0-20:3/D18:1-20:2/D16:0-22:3	768.554	9.14705	9.40231	7.62789				20:4-18:1-18:1-18:1	739.002	1.03263	0.628181	0.735364
A18:0-20:0	810.693	1.30916	1.32236	1.35802	P18:2-22:6/D18:1-20:1	770.512	0.909117	1.02363	0.802532				20:4-18:1-18:1-18:0 20:3-18:1-18:1-18:1	740.01	0.670616	0.374169	0.547737
D16:0-22:6/D18:2-20:4	812.578	5.98995	5.07921	8.87129	P18:1-22:6/D18:0-20:1	772.528	3.18365	3.21571	3.0987				20:4-18:1-18:0-18:0 20:3-18:1-18:1-18:0	741.017	0.287429	0.12491	0.187525
D18:1-20:4/D16:0-22:5	814.594	12.3194	11.4642	16.0256	P18:0-22:6/P18:1-22:5/D18:0-20:0	774.544	5.5905	4.84496	4.6949				22:6-18:3-18:2-18:2	746.97	0.160783	0.0796232	0.130351
D18:2-20:2/D18:0-20:4	816.609	30.2216	21.8586	27.4054	P18:0-22:5/P18:1-22:4	776.559	6.67716	5.96784	5.39541				20:4-20:4-18:2-18:2 20:4-20:4-20:4-16:0 22:6-20:4-18:1-16:1 22:6-22:6-16:0-16:0 22:6-18:2-18:2-18:2	747.978	0.301859	0.194567	0.363765
D18:0-20:3	818.625	0	0.0209498	1.33178	P18:0-22:4/P20:0-20:4/P18:1-22:3	778.575	5.03068	4.05542	3.65064				20:4-20:4-18:2-18:1	748.986	0.311971	0.148489	0.211993
D18:0-20:2/P18:2-22:6	820.641	0	0.650475	0.63199	A20:0-20:4/P18:0-22:3	780.591	3.74831	3.20867	2.35255				20:4-20:4-18:1-18:1	749.994	0.550427	0.363817	0.48664
D18:0-20:1/P18:1-22:6	822.656	0	0	0	P18:0-22:2	782.606	1.77113	1.52131	1.23391				22:6-18:1-18:1-18:1 20:4-20:3-18:1-18:1	751.002	0.551777	0.32376	0.326884
P18:0-22:6	824.615	0.427095	0.348435	0.26168	D18:2-22:6	786.507	0.869973	1.00618	0.678991				22:6-18:1-18:1-18:0	752.01	0.21407	0.1997	0.298641
A18:0-22:6/P18:0-22:5	826.63	1.3133	0.860373	0.465463	D18:1-22:6	788.523	1.60534	2.33159	2.07855				20:4-20:2-18:1-18:0 20:4-20:1-18:1-18:1	753.017	0.196359	0.171227	0.251073
D18:2-22:6	836.578	0.640949	0.821781	0.531293	D18:0-22:6/D18:1-22:5	790.539	5.83744	5.54674	5.83171				20:4-20:1-18:1-18:0	754.025	0.109117	0.128141	0.127282
D18:1-22:6/D18:2-22:5	838.594	4.48101	3.9652	2.68802	D18:0-22:5/D18:1-22:4	792.554	4.18378	4.57022	4.26113				20:4-20:1-18:0-18:0	755.033	0.147326	0.118308	0.150724
D18:0-22:6	840.609	10.6008	7.97652	5.01737	D20:0-20:4/D18:0-22:4	794.57	5.16676	6.51634	5.75347				22:6-20:4-20:4-16:1 22:6-22:6-18:2-16:1	758.97	0.219338	0.181083	0.192008
D18:0-22:5	842.625	6.04086	4.6508	2.90876	D20:0-20:3/D18:0-22:3	796.586	2.2092	2.18937	1.87971				22:6-20:4-18:2-18:2 22:6-20:4-20:4-16:0 22:6-22:6-18:1-16:1	759.978	0.128801	0.0803502	0.0929102
D18:0-22:4/D20:0-20:4/D20:2-20:2	844.641	1.33708	0.855168	1.28158									22:6-20:4-18:2-18:1	760.986	0.230405	0.189308	0.275274
D18:0-22:3/D20:0-20:3/D18:2-22:1	846.656	0	0.00306097	0.0433488									22:6-20:4-18:1-18:1	761.994	0.232116	0.208435	0.167952
D18:0-22:2/D20:0-20:2	848.672	0.0874069	0.130343	0.123114									22:6-20:4-18:1-18:0 22:6-20:3-18:1-18:1	763.002	0.197937	0.153717	0.182378
P20:1-22:6	850.63	0.135351	0.0368936	0.112833									22:4-20:4-18:1-18:1 22:6-20:3-18:1-18:0	764.01	0.372314	0.106314	0.159995
P20:1-22:4	854.661	0.378031	0.223942	0.430465									22:4-20:4-18:1-18:0	765.017	0.323202	0.205443	0.281429
P20:0-22:2	860.708	0.807881	0.654942	0.635711									22:6-20:4-20:4-18:3	770.97	0.111334	0.105155	0.113069
P20:0-22:1	862.724	0.37912	0.424069	0.552935									22:6-22:6-20:4-16:0 20:4-20:4-20:4-20:4 22:6-20:4-20:4-18:2 22:6-22:6-18:2-18:2	771.978	0.137279	0.112489	0.139071
P21:1-22:6	864.646	0.270562	0.249378	0.327673									22:6-20:4-20:4-18:1	772.986	0.157374	0.0793137	0.0986752
P21:1-22:5	866.661	0.395589	0.360046	0.512508									22:6-22:6-18:1-18:1 22:6-20:4-20:3-18:1	773.994	0.20633	0.159022	0.265714
P21:1-22:4	868.677	0.330361	0.404403	0.433076									O-22:6-22:6-18:0-18:1 O-22:6-20:3-20:4-18:0	782.999	0.11898	0.131614	0.0974152
D20:0-22:5/D20:1-22:4	870.656	0.310845	0.200591	0.418693									20:4-20:4-22:6-22:6	795.978	0.399502	0.253473	0.338984
D20:0-22:4/D20:2-22:2	872.672	0.157886	0.118272	0.133541									22:6-22:6-22:6-18:1 22:6-22:6-20:4-20:3	796.986	0.219541	0.223435	0.213938
D20:0-22:3/D20:2-22:1	874.688	0.209117	0.0498431	0.115534									20:4-20:3-22:6-22:5 22:6-22:6-22:6-18:0 22:6-22:6-22:5-18:1	797.994	0.260594	0.171771	0.22206
D20:0-22:2/D20:2-22:0	876.703	0.0947926	0.0624775	0.157068									20:4-22:6-22:6-22:6	807.978	0.259362	0.180097	0.227102
D20:0-22:1	878.719	0.0877826	0.121042	0.18149									20:4-22:6-22:6-22:5	808.986	0.386699	0.304158	0.26801
D20:0-22:0	880.735	0.036715	0.0388656	0.0710296									22:6-22:6-22:6-22:5	813.017	0.235371	0.183282	0.169159

## Sheet: EPEN vivo
PC					PE					PG			CL
A14:0-16:0	698.568	0.40205	0.939492	0.431682	D16:1-16:1	686.476	66.667	66.667	66.667	A16:0-16:0	707.523		18:1-16:1-16:1-16:1	684.955	0.0329524	0.0553214	0.0352924
D14:0-16:1	710.531	1.3778	2.10834	3.80029	P16:0-18:2	698.512	4.0786	4.00473	3.90225	16:0-16:1	719.486	1.47487	18:1-16:1-16:1-16:0	685.963
D14:0-16:0	712.547	2.047	2.49698	2.02353	P18:1-16:0/P16:0-18:1	700.528	7.98388	7.13842	5.94295	16:0-16:0	721.502	1.1303	18:1-16:1-16:0-16:0	686.97
P16:0-16:1/P16:1-16:0/P18:1-14:0	722.568	0.342032	0.703413	0.522744	P18:0-16:0/P16:0-18:0	702.544	6.73183	6.03823	3.86585	16:1-18:2	743.486	1.29993	18:2-18:1-16:1-16:1	698.97	0.159319	0.179121	0.167121
P16:0-16:0/A16:0-16:1	724.583	0.325497	1.19627	0.711789	D16:1-18:2	712.492	4.06262	4.5345	2.80555	16:0-18:2	745.502	3.99457	18:1-18:1-16:1-16:1	699.978	0.211199	0.314948	0.239367
A16:0-16:0	726.599	0.390751	1.09631	1.04127	D16:0-18:2/D16:1-18:1	714.507	10.7282	14.4859	9.54118	16:0-18:1	747.518	2.29721	18:1-18:1-16:0-16:1 18:2-18:1-16:0-16:0 18:2-18:0-16:1-16:0	700.986	0.287505	0.395859	0.263562
D16:1-16:1/D14:1-18:1	736.547	1.32629	2.38555	1.45826	D16:0-18:1	716.523	5.97986	5.55423	5.85057	18:2-18:2	769.502	1.1535	18:1-18:1-16:0-16:0 18:2-18:0-16:0-16:0 18:1-18:0-16:0-16:1	701.994	0.356626	0.565111	0.383448
D16:1-16:0/D14:1-18:0	738.563	8.23308	12.4824	7.61505	P14:0-22:6	718.481	5.94505	4.04983	3.88745	18:1-18:2	771.518	1.29017	20:4-18:2-16:1-16:1	709.963	0.142737	0.249725	0.126785
D16:0-16:0	740.578	4.0745	6.37552	3.22773	P16:1-20:4/ P14:0-22:5	720.497	4.17797	3.66961	2.50965	18:1-18:1	773.533	2.23929	20:4-18:1-16:1-16:1 20:4-18:2-16:1-16:0	710.97	0.220802	0.246141	0.24658
P16:0-18:2/A16:0-18:3	748.583	0.211394	0.186162	0.339715	P16:0-20:4	722.512	8.37618	11.1877	8.62033	18:0-18:1	775.549	1.47031	20:4-18:1-16:1-16:0 18:2-18:2-18:1-16:1	711.978	0.365194	0.545894	0.472064
P16:0-18:1/P18:1-16:0	750.599	0.619438	0.652853	0.746586	P16:0-20:3/P18:1-18:2	724.528	5.38871	6.9796	4.81078				18:2-18:1-18:1-16:1 18:1-18:1-18:1-16:2 18:2-18:1-18:0-16:2 18:2-18:2-18:0-16:1	712.986	0.552597	0.884567	0.762815
P16:0-18:0/P18:0-16:0/A18:1-16:0/A16:0-18:1	752.615	0.629977	1.26657	1.61187	P18:1-18:1/P18:0-18:2/P16:0-20:2	726.544	5.09063	6.60302	5.15574				18:1-18:1-18:1-16:1 18:2-18:1-18:1-16:0	713.994	0.63078	0.919974	0.70916
D14:1-20:3/D16:2-18:2/D14:0-20:4	760.547	0.489501	0.842253	0.467569	P18:0-18:1/P16:0-20:1	728.559	7.47524	7.31794	6.78785				18:1-18:1-18:1-16:0 18:0-18:1-18:1-16:1	715.002	0.332305	0.487084	0.353614
D16:1-18:2	762.563	1.29011	1.373	1.07785	A18:0-18:1	730.575	7.43764	7.04069	4.26147				18:0-18:1-18:1-16:0 18:0-18:0-18:1-16:1	716.01	0.155614	0.226697	0.120791
D16:0-18:2	764.578	11.3515	16.1347	10.4383	D14:1-22:6	732.46	5.49037	5.82275	3.94233				O-20:4-18:1-16:1-16:0 O-18:2-18:2-18:1-16:1	719.976
D16:0-18:1	766.594	17.0907	24.6464	17.2721	D16:2-20:4/D14:1-22:5	734.476	4.42257	4.5082	3.49707				O-18:2-18:1-18:1-16:1 O-18:1-18:1-18:1-16:2 O-18:2-18:1-18:0-16:2 O-18:2-18:2-18:0-16:1	720.984
D16:0-18:0	768.609	1.69428	1.77479	1.17377	D16:1-20:4	736.492	4.54328	7.39726	3.12745				20:4-20:4-16:1-16:1	721.963	0.205905	0.366468	0.246979
P16:0-20:4/P20:4-16:0/P18:2-18:2	772.583	0.185424	0.369722	0.276376	D16:0-20:4/D18:2-18:2	738.507	5.31167	7.596	5.54073				20:4-20:4-16:1-16:0 20:4-18:2-18:2-16:1	722.97	0.149383	0.24324	0.158995
A16:0-20:4	774.599	0.634385	1.07792	0.428158	D18:1-18:2/D16:0-20:3	740.523	4.72084	5.5793	4.95106				20:4-18:2-18:1-16:1	723.978	0.521316	0.801573	0.638996
P18:1-18:1	776.615	0.414491	0.585215	0.581545	D18:0-18:2/D18:1-18:1/D16:0-20:2	742.539	7.79416	10.0593	11.1925				20:4-18:2-18:1-16:0 20:4-18:1-18:1-16:1	724.986	0.862316	1.21663	1.13516
P18:0-18:1/P18:1-18:0	778.63	1.1915	1.47329	2.25793	D18:0-18:1/D16:0-20:1	744.554	71.4543	86.9117	66.7609				20:4-18:1-18:1-16:0 20:3-18:1-18:1-16:1 20:3-18:1-18:1-16:1	725.994	1.06533	1.60631	1.59429
A18:0-18:1/P18:0-18:0	780.646	3.75521	6.03972	7.31721	P16:0-22:6/D18:0-18:0/P18:2-20:4	746.512	6.7919	8.13088	6.27087				18:2-18:1-18:1-18:1	727.002	0.602596	0.903392	0.81453
A16:0-20:0	782.661	4.48417	8.35533	10.6407	P18:1-20:4/P16:0-22:5	748.528	16.1085	20.0048	13.6608				18:1-18:1-18:1-18:1	728.01	0.259085	0.352018	0.342202
D18:2-18:3/D16:1-20:4	786.563	1.18231	1.63605	0.900859	P18:0-20:4/P16:0-22:4/P18:1-20:3	750.544	8.36711	15.162	11.5388				18:1-18:1-18:1-18:0	729.017	0.0971416	0.145524	0.0914231
D18:2-18:2/D16:0-20:4	788.578	13.7809	19.1802	10.0067	P18:0-20:3	752.559	4.86713	7.28517	5.91895				O-20:4-20:4-16:1-16:0 O-20:4-18:2-18:2-16:1	730.968
D18:1-18:2/D16:0-20:3	790.594	6.42392	8.94301	6.70998	P20:1-18:1/P18:1-20:1	754.575	3.72957	4.47457	4.06314				O-20:4-18:2-18:1-16:1	731.976
D18:0-18:2/D18:1-18:1	792.609	11.5284	16.3446	12.1939	P18:1-20:0	756.591	4.88722	5.37189	4.67649				22:6-20:4-16:1-16:1	733.963	0.0311347	0.0402716	0.0436334
D18:0-18:1	794.625	5.6637	7.55514	7.40202	P20:0-18:0/P18:0-20:0	758.476	5.90518	7.16899	6.88774				20:4-20:4-18:2-16:1	734.97	0.0699496	0.0907017	0.0526128
D18:0-18:0	796.641	0.524943	1.49517	1.34838	D16:1-22:6	760.492	4.84742	5.05566	3.71218				20:4-20:4-18:1-16:1	735.978	0.150399	0.244686	0.19266
P18:1-20:4	798.599	0.20298	0.478827	0.49218	D16:0-22:6	762.507	5.03117	5.58287	4.25157				20:4-20:4-18:1-16:0 22:6-18:1-18:1-16:1 22:6-18:2-18:1-16:0	736.986	0.266512	0.542748	0.420409
P18:0-20:4	800.615	0.423786	1.00533	0.609225	D18:1-20:4/D16:0-22:5	764.523	6.1719	7.75706	5.93836				20:4-18:2-18:1-18:1 22:6-18:1-18:1-16:0	737.994	0.349459	0.544581	0.497576
P18:2-20:1/P20:1-18:2/A18:0-20:4	802.63	0.58982	0.993761	1.17335	D18:1-20:3/D18:0-20:4/D16:0-22:4	766.539	17.3355	33.3402	28.361				20:4-18:1-18:1-18:1	739.002	0.29617	0.50977	0.378702
A18:0-20:0	810.693	1.50008	2.48542	3.9548	D18:0-20:3/D18:1-20:2/D16:0-22:3	768.554	8.01124	13.8199	11.9618				20:4-18:1-18:1-18:0 20:3-18:1-18:1-18:1	740.01	0.138294	0.209444	0.217062
D16:0-22:6/D18:2-20:4	812.578	4.3275	6.2886	3.13545	P18:2-22:6/D18:1-20:1	770.512	4.53902	5.77424	5.21918				20:4-18:1-18:0-18:0 20:3-18:1-18:1-18:0	741.017	0.0856072	0.127477	0.0875261
D18:1-20:4/D16:0-22:5	814.594	5.17035	6.86598	3.66486	P18:1-22:6/D18:0-20:1	772.528	6.55684	8.7551	6.65984				22:6-18:3-18:2-18:2	746.97
D18:2-20:2/D18:0-20:4	816.609	8.82909	11.9467	7.91648	P18:0-22:6/P18:1-22:5/D18:0-20:0	774.544	7.74884	10.9961	8.24114				20:4-20:4-18:2-18:2 20:4-20:4-20:4-16:0 22:6-20:4-18:1-16:1 22:6-22:6-16:0-16:0 22:6-18:2-18:2-18:2	747.978	0.215521	0.297107	0.23378
D18:0-20:3	818.625	0.644582	1.88123	2.15079	P18:0-22:5/P18:1-22:4	776.559	8.93813	11.3449	7.47567				20:4-20:4-18:2-18:1	748.986	0.152095	0.217387	0.195251
D18:0-20:2/P18:2-22:6	820.641	0.640746	0.998169	1.98281	P18:0-22:4/P20:0-20:4/P18:1-22:3	778.575	4.96817	8.55931	5.89396				20:4-20:4-18:1-18:1	749.994	0.213232	0.289436	0.264927
D18:0-20:1/P18:1-22:6	822.656	0.374222	0.461143	1.8418	A20:0-20:4/P18:0-22:3	780.591	9.05104	17.0968	10.8993				22:6-18:1-18:1-18:1 20:4-20:3-18:1-18:1	751.002	0.152292	0.195863	0.163072
P18:0-22:6	824.615	0.125913	0.197477	0.75477	P18:0-22:2	782.606	5.42889	7.37682	6.16466				22:6-18:1-18:1-18:0	752.01	0.085277	0.161143	0.116414
A18:0-22:6/P18:0-22:5	826.63	0.0991357	0.175393	0.462684	D18:2-22:6	786.507	4.83208	6.56859	5.04213				20:4-20:2-18:1-18:0 20:4-20:1-18:1-18:1	753.017	0.0539431	0.0802934	0.0729588
D18:2-22:6	836.578	0.283026	0.417877	1.54257	D18:1-22:6	788.523	5.90944	6.63182	4.39672				20:4-20:1-18:1-18:0	754.025	0.0402624	0.0676383	0.042546
D18:1-22:6/D18:2-22:5	838.594	0.558416	0.583659	1.04874	D18:0-22:6/D18:1-22:5	790.539	7.67064	12.4498	10.863				20:4-20:1-18:0-18:0	755.033	0.0344797	0.0479924	0.0342168
D18:0-22:6	840.609	1.06442	1.19773	1.67789	D18:0-22:5/D18:1-22:4	792.554	7.38676	11.7883	9.27695				22:6-20:4-20:4-16:1 22:6-22:6-18:2-16:1	758.97	0.0313559	0.0666121	0.0395929
D18:0-22:5	842.625	0.649511	0.418399	1.02712	D20:0-20:4/D18:0-22:4	794.57	8.77851	23.3003	17.1731				22:6-20:4-18:2-18:2 22:6-20:4-20:4-16:0 22:6-22:6-18:1-16:1	759.978	0.0470341	0.0982908	0.0603461
D18:0-22:4/D20:0-20:4/D20:2-20:2	844.641	0.45567	0.41034	0.963574	D20:0-20:3/D18:0-22:3	796.586	7.20064	12.03	9.29783				22:6-20:4-18:2-18:1	760.986	0.271734	0.150056	0.11202
D18:0-22:3/D20:0-20:3/D18:2-22:1	846.656	0.176586	0.071718	0.684726	D20:0-20:2/D18:0-22:2	798.601	5.513	6.52222	5.46322				22:6-20:4-18:1-18:1	761.994	0.118387	0.119585	0.0781448
D18:0-22:2/D20:0-20:2	848.672	0.0706569	0.129882	0.657278									22:6-20:4-18:1-18:0 22:6-20:3-18:1-18:1	763.002	0.0639803	0.0944016	0.0583635
P20:1-22:6	850.63	0	0	0.364645									22:4-20:4-18:1-18:1 22:6-20:3-18:1-18:0	764.01	0.082246	0.13876	0.103919
P20:1-22:4	854.661	0	0	0.34522									22:4-20:4-18:1-18:0	765.017	0.0867364	0.0790707	0.0616902
P20:0-22:2	860.708	0	0	0.494398									22:6-20:4-20:4-18:3	770.97	0.0796721	0.121029	0.0776624
P20:0-22:1	862.724	0	0	0.57673									22:6-22:6-20:4-16:0 20:4-20:4-20:4-20:4 22:6-20:4-20:4-18:2 22:6-22:6-18:2-18:2	771.978	0.0722712	0.144988	0.073703
P21:1-22:6	864.646	0	0	0.280449									22:6-20:4-20:4-18:1	772.986	0.129525	0.177886	0.0984632
P21:1-22:5	866.661	0	0	0.177486									22:6-22:6-18:1-18:1 22:6-20:4-20:3-18:1	773.994	0.0994494	0.129842	0.102401
P21:1-22:4	868.677	0	0	0.148297									20:4-20:4-22:6-22:6	795.978	0.0925889	0.205698	0.136218
D20:0-22:5/D20:1-22:4	870.656	0	0	0.160112									22:6-22:6-22:6-18:1 22:6-22:6-20:4-20:3	796.986	0.0961397	0.1796	0.0824812
D20:0-22:4/D20:2-22:2	872.672	0	0	0.167641									20:4-20:3-22:6-22:5 22:6-22:6-22:6-18:0 22:6-22:6-22:5-18:1	797.994	0.0517896	0.0868679	0.0484502
D20:0-22:3/D20:2-22:1	874.688	0	0	0.185626									20:4-22:6-22:6-22:6	807.978	0.0526497	0.106234	0.0650866
D20:0-22:2/D20:2-22:0	876.703	0	0	0.212064									22:6-22:6-22:6-22:5	813.017	0.0438282	0.0848324	0.0535418
D20:0-22:1	878.719	0	0	0.285304
D20:0-22:0	880.735	0	0	0.224956

## Sheet: VM M2 vitro
PC					PE					PG			CL
A14:0-16:0	698.568	0.382356	0.221582	0.327071	P16:0-18:2	698.512	3.65149	3.61255	4.08927	A16:0-16:0	707.523	0.38182	18:1-16:1-16:1-16:1	684.955	1.87095	1.11901	1.88698
D14:0-16:1	710.531	19.6899	12.2404	14.5173	P18:1-16:0/P16:0-18:1	700.528	9.17606	10.1576	10.4506	16:0-16:1	719.486	0.442141	18:1-16:1-16:1-16:0	685.963	0.499134	0.373324	0.53908
D14:0-16:0	712.547	5.68862	3.59544	3.87276	P18:0-16:0/P16:0-18:0	702.544	2.33398	2.25557	1.93104	16:0-16:0	721.502	1.46407	18:1-16:1-16:0-16:0	686.97	0.472672	0.340678	0.393906
P16:0-16:1/P16:1-16:0/P18:1-14:0	722.568	0.216124	0.1385	0.138796	D16:1-18:2	712.492	1.76554	1.59072	1.84483	16:1-18:2	743.486	0.161921	18:2-18:1-16:1-16:1	698.97	0.615968	0.709328	0.742677
P16:0-16:0/A16:0-16:1	724.583	1.74466	1.0921	1.12952	D16:0-18:2/D16:1-18:1	714.507	3.08024	2.78067	3.03102	16:0-18:2	745.502	0.46005	18:1-18:1-16:1-16:1	699.978	0.931048	0.675213	0.722227
A16:0-16:0	726.599	3.57049	2.40225	3.1703	D16:0-18:1	716.523	4.85132	4.57913	5.09712	16:0-18:1	747.518	4.01806	18:1-18:1-16:0-16:1 18:2-18:1-16:0-16:0 18:2-18:0-16:1-16:0	700.986	0.64065	0.484131	0.66273
D16:1-16:1/D14:1-18:1	736.547	0	0.264491	0.254175	P14:0-22:6	718.481	1.5676	1.28074	1.33887	18:2-18:2	769.502	0.408897	18:1-18:1-16:0-16:0 18:2-18:0-16:0-16:0 18:1-18:0-16:0-16:1	701.994	0.846803	0.581637	0.87533
D16:1-16:0/D14:1-18:0	738.563	9.21332	7.83913	9.31057	P16:1-20:4/ P14:0-22:5	720.497	3.46503	2.7867	3.02284	18:1-18:2	771.518	0.552313	20:4-18:2-16:1-16:1	709.963	0.212939	0.173966	0.193708
D16:0-16:0	740.578	19.7044	11.2289	14.038	P16:0-20:4	722.512	17.9172	15.9839	17.1779	18:1-18:1	773.533	1.19447	20:4-18:1-16:1-16:1 20:4-18:2-16:1-16:0	710.97	0.331099	0.39554	0.321511
P16:0-18:2/A16:0-18:3	748.583	0.0175728	0.0531546	0.0334249	P16:0-20:3/P18:1-18:2	724.528	5.1512	4.85799	4.88725	18:0-18:1	775.549	1.53054	20:4-18:1-16:1-16:0 18:2-18:2-18:1-16:1	711.978	0.910559	1.06759	0.856754
P16:0-18:1/P18:1-16:0	750.599	0.286417	0.348545	0.394703	P18:1-18:1/P18:0-18:2/P16:0-20:2	726.544	3.05342	3.25968	3.25636				18:2-18:1-18:1-16:1 18:1-18:1-18:1-16:2 18:2-18:1-18:0-16:2 18:2-18:2-18:0-16:1	712.986	1.92841	2.03396	1.72721
P16:0-18:0/P18:0-16:0/A18:1-16:0/A16:0-18:1	752.615	2.0794	2.06485	2.24575	P18:0-18:1/P16:0-20:1	728.559	3.88881	4.82583	4.28748				18:1-18:1-18:1-16:1 18:2-18:1-18:1-16:0	713.994	1.65557	1.40397	1.49648
D14:1-20:3/D16:2-18:2/D14:0-20:4	760.547	0	0	0	A18:0-18:1	730.575	3.14258	3.2465	2.87204				18:1-18:1-18:1-16:0 18:0-18:1-18:1-16:1	715.002	0.550087	0.502008	0.588141
D16:1-18:2	762.563	0	0	0	D14:1-22:6	732.46	1.11496	1.06763	1.06208				18:0-18:1-18:1-16:0 18:0-18:0-18:1-16:1	716.01	0.28359	0.182461	0.24822
D16:0-18:2	764.578	1.4944	3.16365	2.71158	D16:2-20:4/D14:1-22:5	734.476	0.949447	0.674327	0.759049				O-20:4-18:1-16:1-16:0 O-18:2-18:2-18:1-16:1	719.976	0.428486	0.507228	0.433891
D16:0-18:1	766.594	25.84	23.0696	25.2876	D16:1-20:4	736.492	2.44221	1.98208	2.14789				O-18:2-18:1-18:1-16:1 O-18:1-18:1-18:1-16:2 O-18:2-18:1-18:0-16:2 O-18:2-18:2-18:0-16:1	720.984	0.484572	0.444475	0.368817
D16:0-18:0	768.609	4.13075	3.01356	3.4093	D16:0-20:4/D18:2-18:2	738.507	5.75275	4.49932	5.47586				20:4-20:4-16:1-16:1	721.963	0.544214	0.315653	0.409121
P16:0-20:4/P20:4-16:0/P18:2-18:2	772.583	0.33585	0.439047	0.308173	D18:1-18:2/D16:0-20:3	740.523	1.6766	1.72136	1.89466				20:4-20:4-16:1-16:0 20:4-18:2-18:2-16:1	722.97	0.400087	0.330667	0.347846
A16:0-20:4	774.599	0.447523	0.423395	0.260509	D18:0-18:2/D18:1-18:1/D16:0-20:2	742.539	3.83311	4.12413	3.89923				20:4-18:2-18:1-16:1	723.978	0.771214	0.713795	0.59927
P18:1-18:1	776.615	0.445616	0.323296	0.399722	D18:0-18:1/D16:0-20:1	744.554	9.36629	9.32722	8.83933				20:4-18:2-18:1-16:0 20:4-18:1-18:1-16:1	724.986	1.63474	1.75214	1.37949
P18:0-18:1/P18:1-18:0	778.63	1.36067	1.17297	1.08964	P16:0-22:6/D18:0-18:0/P18:2-20:4	746.512	10.751	9.76119	10.0728				20:4-18:1-18:1-16:0 20:3-18:1-18:1-16:1 20:3-18:1-18:1-16:1	725.994	3.01597	3.38404	2.55582
A18:0-18:1/P18:0-18:0	780.646	3.18655	2.84517	2.70712	P18:1-20:4/P16:0-22:5	748.528	19.7704	18.9375	18.7648				18:2-18:1-18:1-18:1	727.002	1.63006	2.11561	1.72437
A16:0-20:0	782.661	4.93596	4.86953	4.37792	P18:0-20:4/P16:0-22:4/P18:1-20:3	750.544	14.0439	13.6101	11.9276				18:1-18:1-18:1-18:1	728.01	0.575371	0.643941	0.469048
D18:2-18:3/D16:1-20:4	786.563	0.46046	0.446615	0.445372	P18:0-20:3	752.559	3.40464	3.34229	3.11288				18:1-18:1-18:1-18:0	729.017	0.268193	0.214555	0.258854
D18:2-18:2/D16:0-20:4	788.578	11.2706	8.72931	8.56559	P20:1-18:1/P18:1-20:1	754.575	1.22483	1.19712	1.06706				O-20:4-20:4-16:1-16:0 O-20:4-18:2-18:2-16:1	730.968	0.367156	0.302379	0.366698
D18:1-18:2/D16:0-20:3	790.594	4.04923	3.6916	3.12001	P18:1-20:0	756.591	1.25524	1.56865	1.31077				O-20:4-18:2-18:1-16:1	731.976	0.211249	0.253397	0.179137
D18:0-18:2/D18:1-18:1	792.609	8.79974	8.95167	7.78475	P20:0-18:0/P18:0-20:0	758.476	1.06493	1.21913	1.02864				22:6-20:4-16:1-16:1	733.963	0.252922	0.260541	0.229579
D18:0-18:1	794.625	16.2803	15.7123	13.571	D16:1-22:6	760.492	0.967277	1.14948	1.29709				20:4-20:4-18:2-16:1	734.97	0.280986	0.26463	0.27849
D18:0-18:0	796.641	0.884772	0.535835	0.562197	D16:0-22:6	762.507	3.37618	2.93751	3.219				20:4-20:4-18:1-16:1	735.978	0.450377	0.491265	0.363998
P18:1-20:4	798.599	0.620209	1.21457	0.312094	D18:1-20:4/D16:0-22:5	764.523	5.21321	4.54682	4.82194				20:4-20:4-18:1-16:0 22:6-18:1-18:1-16:1 22:6-18:2-18:1-16:0	736.986	1.45708	1.40401	1.14664
P18:0-20:4	800.615	1.78712	5.02878	1.0195	D18:1-20:3/D18:0-20:4/D16:0-22:4	766.539	30.8212	26.3685	26.6397				20:4-18:2-18:1-18:1 22:6-18:1-18:1-16:0	737.994	1.23544	1.49637	1.0596
P18:2-20:1/P20:1-18:2/A18:0-20:4	802.63	0.824129	2.12312	0.640985	D18:0-20:3/D18:1-20:2/D16:0-22:3	768.554	8.77802	8.4188	8.6527				20:4-18:1-18:1-18:1	739.002	1.08738	1.11441	0.792738
A18:0-20:0	810.693	1.20311	1.21996	0.823233	P18:2-22:6/D18:1-20:1	770.512	1.02916	1.02007	1.00946				20:4-18:1-18:1-18:0 20:3-18:1-18:1-18:1	740.01	0.429418	0.367057	0.357754
D16:0-22:6/D18:2-20:4	812.578	11.5482	17.9167	7.10077	P18:1-22:6/D18:0-20:1	772.528	2.08504	1.95119	1.97855				20:4-18:1-18:0-18:0 20:3-18:1-18:1-18:0	741.017	0.155444	0.226475	0.158877
D18:1-20:4/D16:0-22:5	814.594	10.0851	17.4112	5.76485	P18:0-22:6/P18:1-22:5/D18:0-20:0	774.544	5.28808	5.30126	5.00784				22:6-18:3-18:2-18:2	746.97	0.447108	0.321765	0.269855
D18:2-20:2/D18:0-20:4	816.609	13.6432	23.8899	7.45623	P18:0-22:5/P18:1-22:4	776.559	6.54651	6.49922	5.94628				20:4-20:4-18:2-18:2 20:4-20:4-20:4-16:0 22:6-20:4-18:1-16:1 22:6-22:6-16:0-16:0 22:6-18:2-18:2-18:2	747.978	1.28032	0.803681	0.900104
D18:0-20:3	818.625	0.379524	3.18201	0.719149	P18:0-22:4/P20:0-20:4/P18:1-22:3	778.575	5.50936	5.11101	4.77204				20:4-20:4-18:2-18:1	748.986	0.458129	0.542795	0.375576
D18:0-20:2/P18:2-22:6	820.641	0.140948	1.67034	0.47249	A20:0-20:4/P18:0-22:3	780.591	3.57639	3.10669	3.05037				20:4-20:4-18:1-18:1	749.994	0.805284	0.786153	0.640438
D18:0-20:1/P18:1-22:6	822.656	0	0	0	P18:0-22:2	782.606	2.31006	1.93104	2.25668				22:6-18:1-18:1-18:1 20:4-20:3-18:1-18:1	751.002	1.0514	0.878806	0.842581
P18:0-22:6	824.615	0.301143	0.123514	0.135336	D18:2-22:6	786.507	0.688576	1.03536	1.0211				22:6-18:1-18:1-18:0	752.01	0.454061	0.539276	0.50852
A18:0-22:6/P18:0-22:5	826.63	0.7721	0.811255	0.464559	D18:1-22:6	788.523	1.8274	2.15897	2.06639				20:4-20:2-18:1-18:0 20:4-20:1-18:1-18:1	753.017	0.236248	0.198619	0.202504
D18:2-22:6	836.578	0.827863	0.675363	0.668145	D18:0-22:6/D18:1-22:5	790.539	11.9467	10.8144	11.2585				20:4-20:1-18:1-18:0	754.025	0.0936858	0.154114	0.146898
D18:1-22:6/D18:2-22:5	838.594	2.78486	2.14117	1.98086	D18:0-22:5/D18:1-22:4	792.554	10.4267	9.90229	9.44422				20:4-20:1-18:0-18:0	755.033	0.114262	0.122968	0.119464
D18:0-22:6	840.609	8.77705	6.00261	5.14725	D20:0-20:4/D18:0-22:4	794.57	9.81101	9.27508	8.54473				22:6-20:4-20:4-16:1 22:6-22:6-18:2-16:1	758.97	0.258133	0.225723	0.263542
D18:0-22:5	842.625	5.65535	4.65609	3.15278	D20:0-20:3/D18:0-22:3	796.586	2.64643	2.18259	2.32533				22:6-20:4-18:2-18:2 22:6-20:4-20:4-16:0 22:6-22:6-18:1-16:1	759.978	0.127097	0.156335	0.153483
D18:0-22:4/D20:0-20:4/D20:2-20:2	844.641	2.85507	2.17214	1.46656									22:6-20:4-18:2-18:1	760.986	0.293948	0.277763	0.30209
D18:0-22:3/D20:0-20:3/D18:2-22:1	846.656	0.0685731	0.032904	0.0835372									22:6-20:4-18:1-18:1	761.994	0.273487	0.248832	0.221532
D18:0-22:2/D20:0-20:2	848.672	0.233072	0.350792	0.234938									22:6-20:4-18:1-18:0 22:6-20:3-18:1-18:1	763.002	0.278427	0.26653	0.222581
P20:1-22:6	850.63	0.191123	0.120802	0.233035									22:4-20:4-18:1-18:1 22:6-20:3-18:1-18:0	764.01	0.230505	0.203578	0.150078
P20:1-22:4	854.661	0.588101	0.469995	0.400441									22:4-20:4-18:1-18:0	765.017	0.233679	0.219073	0.176736
P20:0-22:2	860.708	0.608666	0.490325	0.401283									22:6-20:4-20:4-18:3	770.97	0.102974	0.116617	0.0924989
P20:0-22:1	862.724	0.490055	0.362793	0.259532									22:6-22:6-20:4-16:0 20:4-20:4-20:4-20:4 22:6-20:4-20:4-18:2 22:6-22:6-18:2-18:2	771.978	0.281833	0.195169	0.210147
P21:1-22:6	864.646	0.575749	0.364256	0.405095									22:6-20:4-20:4-18:1	772.986	0.109233	0.112004	0.126085
P21:1-22:5	866.661	0.919445	0.571399	0.595531									22:6-22:6-18:1-18:1 22:6-20:4-20:3-18:1	773.994	0.46928	0.479786	0.319518
P21:1-22:4	868.677	1.20409	0.762163	0.58076									O-22:6-22:6-18:0-18:1 O-22:6-20:3-20:4-18:0	782.999	0.139422	0.149368	0.135768
D20:0-22:5/D20:1-22:4	870.656	0.948221	0.61573	0.5017									20:4-20:4-22:6-22:6	795.978	0.529996	0.291054	0.42119
D20:0-22:4/D20:2-22:2	872.672	0.495498	0.368374	0.329357									22:6-22:6-22:6-18:1 22:6-22:6-20:4-20:3	796.986	0.276876	0.226097	0.275285
D20:0-22:3/D20:2-22:1	874.688	0.158581	0.202928	0.113161									20:4-20:3-22:6-22:5 22:6-22:6-22:6-18:0 22:6-22:6-22:5-18:1	797.994	0.308103	0.252877	0.234572
D20:0-22:2/D20:2-22:0	876.703	0.282689	0.206288	0.1684									20:4-22:6-22:6-22:6	807.978	0.330659	0.257149	0.364244
D20:0-22:1	878.719	0.121343	0.145233	0.14607									20:4-22:6-22:6-22:5	808.986	0.336508	0.252754	0.257291
D20:0-22:0	880.735	0.128398	0.0482329	0.105094									22:6-22:6-22:6-22:5	813.017	0.187162	0.2276	0.167635

## Sheet: VM M2 vivo
PC					PE					PG			CL
A14:0-16:0	698.568	1.01959	1.05037	1.29767	P16:0-18:2	698.512	2.01742	2.78867	2.21871	A16:0-16:0	707.523		18:1-16:1-16:1-16:1	684.955
D14:0-16:1	710.531	2.93708	2.74386	2.88739	P18:1-16:0/P16:0-18:1	700.528	3.64268	5.21929	4.08602	16:0-16:1	719.486	1.05491	18:1-16:1-16:1-16:0	685.963
D14:0-16:0	712.547	5.11954	4.78642	5.9792	P18:0-16:0/P16:0-18:0	702.544	5.05558	6.30051	5.85711	16:0-16:0	721.502	0.382453	18:1-16:1-16:0-16:0	686.97
P16:0-16:1/P16:1-16:0/P18:1-14:0	722.568	0.42271	0.533239	0.556764	D16:1-18:2	712.492	1.33846	2.193	1.50208	16:1-18:2	743.486	0.558202	18:2-18:1-16:1-16:1	698.97	0.85205	0.854092	1.04094
P16:0-16:0/A16:0-16:1	724.583	0.87656	0.947106	0.953197	D16:0-18:2/D16:1-18:1	714.507	4.50319	6.09834	5.70339	16:0-18:2	745.502	0.959051	18:1-18:1-16:1-16:1	699.978	1.27444	1.22344	1.37523
A16:0-16:0	726.599	1.65281	1.4531	1.50516	D16:0-18:1	716.523	3.34425	4.27746	4.58506	16:0-18:1	747.518	2.01672	18:1-18:1-16:0-16:1 18:2-18:1-16:0-16:0 18:2-18:0-16:1-16:0	700.986	0.963257	0.797984	1.14659
D16:1-16:1/D14:1-18:1	736.547	0.583739	0.60896	0.670466	P14:0-22:6	718.481	13.7759	13.9173	16.1413	18:2-18:2	769.502	0.402672	18:1-18:1-16:0-16:0 18:2-18:0-16:0-16:0 18:1-18:0-16:0-16:1	701.994	1.30048	0.965019	1.15283
D16:1-16:0/D14:1-18:0	738.563	1.95403	2.31256	3.18929	P16:1-20:4/ P14:0-22:5	720.497	2.03273	3.23353	2.40481	18:1-18:2	771.518	0.824359	20:4-18:2-16:1-16:1	709.963
D16:0-16:0	740.578	4.81751	5.01579	5.25134	P16:0-20:4	722.512	2.83835	4.16682	2.60812	18:1-18:1	773.533	1.72207	20:4-18:1-16:1-16:1 20:4-18:2-16:1-16:0	710.97
P16:0-18:2/A16:0-18:3	748.583	0.216764	0.254396	0.233802	P16:0-20:3/P18:1-18:2	724.528	1.94363	3.08525	2.12896	18:0-18:1	775.549	0.561527	20:4-18:1-16:1-16:0 18:2-18:2-18:1-16:1	711.978	2.36101	2.49887	2.18396
P16:0-18:1/P18:1-16:0	750.599	0.651129	0.740159	0.712428	P18:1-18:1/P18:0-18:2/P16:0-20:2	726.544	1.56665	2.57306	1.92345				18:2-18:1-18:1-16:1 18:1-18:1-18:1-16:2 18:2-18:1-18:0-16:2 18:2-18:2-18:0-16:1	712.986	0.912044	1.00063	1.20995
P16:0-18:0/P18:0-16:0/A18:1-16:0/A16:0-18:1	752.615	1.17516	1.22191	1.52344	P18:0-18:1/P16:0-20:1	728.559	2.63541	3.9212	3.73462				18:1-18:1-18:1-16:1 18:2-18:1-18:1-16:0	713.994	1.81721	1.79384	2.34423
D14:1-20:3/D16:2-18:2/D14:0-20:4	760.547	0.100155	0.0996498	0.136615	A18:0-18:1	730.575	10.9934	7.07385	11.7007				18:1-18:1-18:1-16:0 18:0-18:1-18:1-16:1	715.002	1.26756	1.33456	1.42046
D16:1-18:2	762.563	0.260968	0.352913	0.270105	D14:1-22:6	732.46	3.03126	4.01903	3.45128				18:0-18:1-18:1-16:0 18:0-18:0-18:1-16:1	716.01
D16:0-18:2	764.578	7.33703	8.34421	6.41557	D16:2-20:4/D14:1-22:5	734.476	2.84657	4.07601	3.41614				O-20:4-18:1-16:1-16:0 O-18:2-18:2-18:1-16:1	719.976
D16:0-18:1	766.594	7.626	8.57493	9.68686	D16:1-20:4	736.492	2.12941	3.23889	2.44492				O-18:2-18:1-18:1-16:1 O-18:1-18:1-18:1-16:2 O-18:2-18:1-18:0-16:2 O-18:2-18:2-18:0-16:1	720.984
D16:0-18:0	768.609	2.35245	2.31506	2.73618	D16:0-20:4/D18:2-18:2	738.507	1.70648	2.54079	1.77616				20:4-20:4-16:1-16:1	721.963
P16:0-20:4/P20:4-16:0/P18:2-18:2	772.583	0.146001	0.121031	0.150506	D18:1-18:2/D16:0-20:3	740.523	2.31167	3.45223	2.544				20:4-20:4-16:1-16:0 20:4-18:2-18:2-16:1	722.97
A16:0-20:4	774.599	0.0918695	0.14919	0.117845	D18:0-18:2/D18:1-18:1/D16:0-20:2	742.539	5.28319	6.28675	6.86121				20:4-18:2-18:1-16:1	723.978	1.70506	1.0761	1.4894
P18:1-18:1	776.615	0.337581	0.362343	0.368218	D18:0-18:1/D16:0-20:1	744.554	15.4378	17.4595	15.5466				20:4-18:2-18:1-16:0 20:4-18:1-18:1-16:1	724.986	1.37578	1.44105	1.22566
P18:0-18:1/P18:1-18:0	778.63	5.40182	5.56772	6.06859	P16:0-22:6/D18:0-18:0/P18:2-20:4	746.512	3.54572	4.15986	4.25111				20:4-18:1-18:1-16:0 20:3-18:1-18:1-16:1 20:3-18:1-18:1-16:1	725.994	1.57248	1.63211	1.52966
A18:0-18:1/P18:0-18:0	780.646	7.7359	8.78325	7.22455	P18:1-20:4/P16:0-22:5	748.528	5.06646	9.02138	5.79958				18:2-18:1-18:1-18:1	727.002	1.40379	0.925962	1.71917
A16:0-20:0	782.661	6.1258	7.43816	8.26907	P18:0-20:4/P16:0-22:4/P18:1-20:3	750.544	4.03293	5.12728	4.74656				18:1-18:1-18:1-18:1	728.01	1.18808	1.10602	1.70947
D18:2-18:3/D16:1-20:4	786.563	0.0604039	0.0919661	0.0774754	P18:0-20:3	752.559	1.62642	2.76948	1.91584				18:1-18:1-18:1-18:0	729.017
D18:2-18:2/D16:0-20:4	788.578	0.674513	0.921867	0.289272	P20:1-18:1/P18:1-20:1	754.575	1.85569	2.72382	2.00467				O-20:4-20:4-16:1-16:0 O-20:4-18:2-18:2-16:1	730.968
D18:1-18:2/D16:0-20:3	790.594	1.94517	2.53266	1.48862	P18:1-20:0	756.591	2.13429	3.34269	2.67232				O-20:4-18:2-18:1-16:1	731.976
D18:0-18:2/D18:1-18:1	792.609	5.63232	6.50804	5.32047	P20:0-18:0/P18:0-20:0	758.476	3.46896	3.98782	4.21581				22:6-20:4-16:1-16:1	733.963
D18:0-18:1	794.625	5.85514	6.06188	5.97488	D16:1-22:6	760.492	2.6956	3.75446	3.27622				20:4-20:4-18:2-16:1	734.97
D18:0-18:0	796.641	9.78635	9.55436	8.57788	D16:0-22:6	762.507	3.24125	3.66629	3.72071				20:4-20:4-18:1-16:1	735.978
P18:1-20:4	798.599	0.207434	0.249133	0.27589	D18:1-20:4/D16:0-22:5	764.523	2.28691	3.62507	2.4667				20:4-20:4-18:1-16:0 22:6-18:1-18:1-16:1 22:6-18:2-18:1-16:0	736.986	2.36337	1.77164	3.00986
P18:0-20:4	800.615	0.212458	0.298777	0.276624	D18:1-20:3/D18:0-20:4/D16:0-22:4	766.539	2.87702	4.10757	2.61834				20:4-18:2-18:1-18:1 22:6-18:1-18:1-16:0	737.994	1.85221	2.91363	2.18382
P18:2-20:1/P20:1-18:2/A18:0-20:4	802.63	0.329975	0.451774	0.236071	D18:0-20:3/D18:1-20:2/D16:0-22:3	768.554	3.20478	4.90016	3.27252				20:4-18:1-18:1-18:1	739.002	1.2106	1.16583	1.44679
A18:0-20:0	810.693	3.63986	3.87526	3.98463	P18:2-22:6/D18:1-20:1	770.512	2.40341	3.59554	2.85277				20:4-18:1-18:1-18:0 20:3-18:1-18:1-18:1	740.01	1.77829	3.03532	1.42595
D16:0-22:6/D18:2-20:4	812.578	0	0.437203	0.290346	P18:1-22:6/D18:0-20:1	772.528	3.11651	4.86254	4.07956				20:4-18:1-18:0-18:0 20:3-18:1-18:1-18:0	741.017
D18:1-20:4/D16:0-22:5	814.594	0.17957	0.277245	0.218788	P18:0-22:6/P18:1-22:5/D18:0-20:0	774.544	5.00472	5.6813	6.92381				22:6-18:3-18:2-18:2	746.97
D18:2-20:2/D18:0-20:4	816.609	0.680666	1.15061	0.380314	P18:0-22:5/P18:1-22:4	776.559	4.20438	5.96236	4.35073				20:4-20:4-18:2-18:2 20:4-20:4-20:4-16:0 22:6-20:4-18:1-16:1 22:6-22:6-16:0-16:0 22:6-18:2-18:2-18:2	747.978
D18:0-20:3	818.625	0.885874	1.03178	0.641019	P18:0-22:4/P20:0-20:4/P18:1-22:3	778.575	2.06234	3.13493	2.33656				20:4-20:4-18:2-18:1	748.986
D18:0-20:2/P18:2-22:6	820.641	2.18573	2.53885	2.02781	A20:0-20:4/P18:0-22:3	780.591	2.07307	3.41479	2.34585				20:4-20:4-18:1-18:1	749.994
D18:0-20:1/P18:1-22:6	822.656	4.45642	4.81178	4.60964	P18:0-22:2	782.606	2.30536	3.10503	2.1847				22:6-18:1-18:1-18:1 20:4-20:3-18:1-18:1	751.002
P18:0-22:6	824.615	0.567138	1.04946	0.835021	D18:2-22:6	786.507	3.43656	4.66302	3.98076				22:6-18:1-18:1-18:0	752.01
A18:0-22:6/P18:0-22:5	826.63	0.274053	0.434831	0.37154	D18:1-22:6	788.523	3.24949	4.72502	3.98654				20:4-20:2-18:1-18:0 20:4-20:1-18:1-18:1	753.017
D18:2-22:6	836.578	0	0	0	D18:0-22:6/D18:1-22:5	790.539	2.74884	3.82932	3.03387				20:4-20:1-18:1-18:0	754.025
D18:1-22:6/D18:2-22:5	838.594	0	0.26713	0	D18:0-22:5/D18:1-22:4	792.554	2.93597	3.97746	2.72237				20:4-20:1-18:0-18:0	755.033
D18:0-22:6	840.609	0.235571	0.503969	0.400704	D20:0-20:4/D18:0-22:4	794.57	2.90392	4.26368	2.88853				22:6-20:4-20:4-16:1 22:6-22:6-18:2-16:1	758.97
D18:0-22:5	842.625	0.199156	0.334588	0.316896	D20:0-20:3/D18:0-22:3	796.586	2.61844	3.74414	2.49949				22:6-20:4-18:2-18:2 22:6-20:4-20:4-16:0 22:6-22:6-18:1-16:1	759.978
D18:0-22:4/D20:0-20:4/D20:2-20:2	844.641	0.460116	0.577725	0.271229	D20:0-20:2/D18:0-22:2	798.601	2.62375	3.79636	2.57485				22:6-20:4-18:2-18:1	760.986	1.21951	1.04255	1.66112
D18:0-22:3/D20:0-20:3/D18:2-22:1	846.656	0.539052	0.814765	0.489576									22:6-20:4-18:1-18:1	761.994	1.46931	1.17752	1.41244
D18:0-22:2/D20:0-20:2	848.672	1.06455	1.27789	1.06151									22:6-20:4-18:1-18:0 22:6-20:3-18:1-18:1	763.002	1.12868	0.924572	1.43393
P20:1-22:6	850.63	0	0.261255	0.219924									22:4-20:4-18:1-18:1 22:6-20:3-18:1-18:0	764.01	1.44709	1.82745	1.17027
P20:1-22:4	854.661	0.290787	0.511216	0.454781									22:4-20:4-18:1-18:0	765.017
P20:0-22:2	860.708	0.885952	1.47133	0.490421									22:6-20:4-20:4-18:3	770.97
P20:0-22:1	862.724	1.79396	2.52384	1.29338									22:6-22:6-20:4-16:0 20:4-20:4-20:4-20:4 22:6-20:4-20:4-18:2 22:6-22:6-18:2-18:2	771.978
P21:1-22:6	864.646	0.126875	0.448141	0.219911									22:6-20:4-20:4-18:1	772.986	1.78918	2.2634	2.69012
P21:1-22:5	866.661	0.163395	0.422469	0.264955									22:6-22:6-18:1-18:1 22:6-20:4-20:3-18:1	773.994	1.36656	2.20816	3.33863
P21:1-22:4	868.677	0.234519	0.501598	0.413424									20:4-20:4-22:6-22:6	795.978
D20:0-22:5/D20:1-22:4	870.656	0.184041	0.250348	0.213721									22:6-22:6-22:6-18:1 22:6-22:6-20:4-20:3	796.986
D20:0-22:4/D20:2-22:2	872.672	0.244957	0.450362	0.206681									20:4-20:3-22:6-22:5 22:6-22:6-22:6-18:0 22:6-22:6-22:5-18:1	797.994
D20:0-22:3/D20:2-22:1	874.688	0.318415	0.47577	0.172086									20:4-22:6-22:6-22:6	807.978
D20:0-22:2/D20:2-22:0	876.703	0.834811	1.19334	0.479528									22:6-22:6-22:6-22:5	813.017
D20:0-22:1	878.719	0.735062	1.35754	0.665831
D20:0-22:0	880.735	1.21228	1.34353	0.655655

## Sheet: VM NM1 vitro
PC					PE					PG			CL
A14:0-16:0	698.568	0.153586	0.149715	0.245249	P16:0-18:2	698.512	3.34565	2.80622	2.47954	A16:0-16:0	707.523	2.15444	18:1-16:1-16:1-16:1	684.955	0.947665	0.817049
D14:0-16:1	710.531	4.97083	4.12383	4.35996	P18:1-16:0/P16:0-18:1	700.528	4.09934	3.65571	3.32732	16:0-16:1	719.486	0.346931	18:1-16:1-16:1-16:0	685.963	0.324152	0.30682
D14:0-16:0	712.547	2.87494	2.6593	3.23074	P18:0-16:0/P16:0-18:0	702.544	2.36564	2.67204	1.5958	16:0-16:0	721.502	0.260744	18:1-16:1-16:0-16:0	686.97	0.457282	0.449684
P16:0-16:1/P16:1-16:0/P18:1-14:0	722.568	0.124788	0.0880091	0.0974694	D16:1-18:2	712.492	1.10928	1.27835	0.992632	16:1-18:2	743.486	0.113415	18:2-18:1-16:1-16:1	698.97	0.532733	0.434518
P16:0-16:0/A16:0-16:1	724.583	0.710707	0.755392	0.923079	D16:0-18:2/D16:1-18:1	714.507	2.83884	2.4693	2.39877	16:0-18:2	745.502	0.7271	18:1-18:1-16:1-16:1	699.978	1.3126	1.12039
A16:0-16:0	726.599	1.27076	1.01485	1.26235	D16:0-18:1	716.523	2.57549	2.87838	2.54876	16:0-18:1	747.518	2.47769	18:1-18:1-16:0-16:1 18:2-18:1-16:0-16:0 18:2-18:0-16:1-16:0	700.986	1.05327	0.956468
D16:1-16:1/D14:1-18:1	736.547	1.33919	1.79646	0.598082	P14:0-22:6	718.481	1.02149	1.20449	0.9765	18:2-18:2	769.502	0.196321	18:1-18:1-16:0-16:0 18:2-18:0-16:0-16:0 18:1-18:0-16:0-16:1	701.994	0.8689	0.627685
D16:1-16:0/D14:1-18:0	738.563	11.6691	13.8822	11.8119	P16:1-20:4/ P14:0-22:5	720.497	2.02819	1.90085	1.70423	18:1-18:2	771.518	0.362487	20:4-18:2-16:1-16:1	709.963	0.0819991	0.0966734
D16:0-16:0	740.578	6.74114	5.47564	7.73966	P16:0-20:4	722.512	6.48185	5.09451	5.38585	18:1-18:1	773.533	1.63186	20:4-18:1-16:1-16:1 20:4-18:2-16:1-16:0	710.97	0.323178	0.256192
P16:0-18:2/A16:0-18:3	748.583	0.101935	0.0688053	0.0397481	P16:0-20:3/P18:1-18:2	724.528	2.60463	2.08147	2.26831	18:0-18:1	775.549	0.773492	20:4-18:1-16:1-16:0 18:2-18:2-18:1-16:1	711.978	0.597729	0.462796
P16:0-18:1/P18:1-16:0	750.599	0.467385	0.644185	0.628755	P18:1-18:1/P18:0-18:2/P16:0-20:2	726.544	2.55875	2.05803	2.01402				18:2-18:1-18:1-16:1 18:1-18:1-18:1-16:2 18:2-18:1-18:0-16:2 18:2-18:2-18:0-16:1	712.986	1.5641	1.19459
P16:0-18:0/P18:0-16:0/A18:1-16:0/A16:0-18:1	752.615	1.80532	2.16866	2.15319	P18:0-18:1/P16:0-20:1	728.559	3.28784	3.15612	2.55689				18:1-18:1-18:1-16:1 18:2-18:1-18:1-16:0	713.994	2.09638	1.69748
D14:1-20:3/D16:2-18:2/D14:0-20:4	760.547	0.165568	0.344557	0	A18:0-18:1	730.575	3.44336	3.62011	3.26024				18:1-18:1-18:1-16:0 18:0-18:1-18:1-16:1	715.002	0.800463	0.718746
D16:1-18:2	762.563	0.792913	1.03742	0	D14:1-22:6	732.46	0.699087	0.788861	0.648355				18:0-18:1-18:1-16:0 18:0-18:0-18:1-16:1	716.01	0.229797	0.168076
D16:0-18:2	764.578	7.24416	9.92688	4.65059	D16:2-20:4/D14:1-22:5	734.476	1.04556	0.945275	0.622663				O-20:4-18:1-16:1-16:0 O-18:2-18:2-18:1-16:1	719.976	0.255853	0.197025
D16:0-18:1	766.594	23.9197	28.8615	25.6033	D16:1-20:4	736.492	1.51234	1.36567	1.16499				O-18:2-18:1-18:1-16:1 O-18:1-18:1-18:1-16:2 O-18:2-18:1-18:0-16:2 O-18:2-18:2-18:0-16:1	720.984	0.291871	0.291365
D16:0-18:0	768.609	1.7156	1.62215	1.91983	D16:0-20:4/D18:2-18:2	738.507	2.16728	2.28793	1.9687				20:4-20:4-16:1-16:1	721.963	0.182822	0.194805
P16:0-20:4/P20:4-16:0/P18:2-18:2	772.583	0.549372	0.414104	0	D18:1-18:2/D16:0-20:3	740.523	1.23236	1.31649	1.10087				20:4-20:4-16:1-16:0 20:4-18:2-18:2-16:1	722.97	0.196564	0.210517
A16:0-20:4	774.599	0.449102	0.582943	0	D18:0-18:2/D18:1-18:1/D16:0-20:2	742.539	3.42999	3.23722	3.14642				20:4-18:2-18:1-16:1	723.978	0.412709	0.311078
P18:1-18:1	776.615	0.48304	0.425625	0.496196	D18:0-18:1/D16:0-20:1	744.554	10.3674	7.09254	8.28995				20:4-18:2-18:1-16:0 20:4-18:1-18:1-16:1	724.986	0.685245	0.52818
P18:0-18:1/P18:1-18:0	778.63	1.51382	1.41667	2.02361	P16:0-22:6/D18:0-18:0/P18:2-20:4	746.512	7.6911	5.79006	5.56537				20:4-18:1-18:1-16:0 20:3-18:1-18:1-16:1 20:3-18:1-18:1-16:1	725.994	1.08432	0.751436
A18:0-18:1/P18:0-18:0	780.646	2.49324	2.38057	3.40455	P18:1-20:4/P16:0-22:5	748.528	13.8333	11.7836	11.1589				18:2-18:1-18:1-18:1	727.002	1.20027	0.912934
A16:0-20:0	782.661	4.76722	4.34318	3.01363	P18:0-20:4/P16:0-22:4/P18:1-20:3	750.544	5.86151	4.37417	4.44386				18:1-18:1-18:1-18:1	728.01	0.86203	0.563587
D18:2-18:3/D16:1-20:4	786.563	0.645901	1.05047	0	P18:0-20:3	752.559	2.73934	2.18659	2.28046				18:1-18:1-18:1-18:0	729.017	0.206969	0.192944
D18:2-18:2/D16:0-20:4	788.578	3.82722	5.89687	0	P20:1-18:1/P18:1-20:1	754.575	1.69101	1.46254	1.37097				O-20:4-20:4-16:1-16:0 O-20:4-18:2-18:2-16:1	730.968	0.194724	0.19197
D18:1-18:2/D16:0-20:3	790.594	4.1711	5.40315	2.03246	P18:1-20:0	756.591	1.35634	1.14731	1.1321				O-20:4-18:2-18:1-16:1	731.976	0.103728	0.113933
D18:0-18:2/D18:1-18:1	792.609	14.5092	18.0003	16.871	P20:0-18:0/P18:0-20:0	758.476	1.37688	1.21625	1.08014				22:6-20:4-16:1-16:1	733.963	0.115675	0.0914464
D18:0-18:1	794.625	13.0308	13.6734	18.0096	D16:1-22:6	760.492	1.13284	1.1311	1.03422				20:4-20:4-18:2-16:1	734.97	0.176006	0.131177
D18:0-18:0	796.641	0.342118	0.184414	0.313416	D16:0-22:6	762.507	1.22686	1.20241	1.06648				20:4-20:4-18:1-16:1	735.978	0.172895	0.15412
P18:1-20:4	798.599	0.959754	0.816543	0.0719245	D18:1-20:4/D16:0-22:5	764.523	3.37993	3.81051	3.54547				20:4-20:4-18:1-16:0 22:6-18:1-18:1-16:1 22:6-18:2-18:1-16:0	736.986	0.407432	0.307691
P18:0-20:4	800.615	3.65746	2.5949	1.60515	D18:1-20:3/D18:0-20:4/D16:0-22:4	766.539	9.17587	11.6773	10.0236				20:4-18:2-18:1-18:1 22:6-18:1-18:1-16:0	737.994	0.427343	0.331735
P18:2-20:1/P20:1-18:2/A18:0-20:4	802.63	0.700484	0.829146	0.495611	D18:0-20:3/D18:1-20:2/D16:0-22:3	768.554	7.8691	8.65644	7.29022				20:4-18:1-18:1-18:1	739.002	0.417118	0.36073
A18:0-20:0	810.693	3.34803	3.03422	1.84894	P18:2-22:6/D18:1-20:1	770.512	1.04784	1.00345	0.955493				20:4-18:1-18:1-18:0 20:3-18:1-18:1-18:1	740.01	0.325384	0.284111
D16:0-22:6/D18:2-20:4	812.578	2.11495	2.72658	0	P18:1-22:6/D18:0-20:1	772.528	2.81548	2.23092	2.16455				20:4-18:1-18:0-18:0 20:3-18:1-18:1-18:0	741.017	0.128568	0.0733543
D18:1-20:4/D16:0-22:5	814.594	4.05851	5.71706	0.410099	P18:0-22:6/P18:1-22:5/D18:0-20:0	774.544	5.11026	3.8745	3.80789				22:6-18:3-18:2-18:2	746.97	0.22286	0.228192
D18:2-20:2/D18:0-20:4	816.609	7.61278	8.87074	4.35722	P18:0-22:5/P18:1-22:4	776.559	4.28694	3.68151	3.30135				20:4-20:4-18:2-18:2 20:4-20:4-20:4-16:0 22:6-20:4-18:1-16:1 22:6-22:6-16:0-16:0 22:6-18:2-18:2-18:2	747.978	0.689338	0.578637
D18:0-20:3	818.625	3.11816	3.01882	2.75372	P18:0-22:4/P20:0-20:4/P18:1-22:3	778.575	2.77958	2.23093	1.95049				20:4-20:4-18:2-18:1	748.986	0.1168	0.10678
D18:0-20:2/P18:2-22:6	820.641	1.18711	0.707225	2.00159	A20:0-20:4/P18:0-22:3	780.591	3.03022	2.38031	2.05852				20:4-20:4-18:1-18:1	749.994	0.327798	0.213305
D18:0-20:1/P18:1-22:6	822.656	0	0.140451	0.0894825	P18:0-22:2	782.606	2.0924	1.61845	1.48125				22:6-18:1-18:1-18:1 20:4-20:3-18:1-18:1	751.002	0.213526	0.185223
P18:0-22:6	824.615	0.59493	0.5748	0.242131	D18:2-22:6	786.507	0.967408	0.988899	0.958687				22:6-18:1-18:1-18:0	752.01
A18:0-22:6/P18:0-22:5	826.63	2.6188	1.44268	1.43286	D18:1-22:6	788.523	2.34328	2.07844	2.294				20:4-20:2-18:1-18:0 20:4-20:1-18:1-18:1	753.017
D18:2-22:6	836.578				D18:0-22:6/D18:1-22:5	790.539	2.97717	3.69579	3.07169				20:4-20:1-18:1-18:0	754.025
D18:1-22:6/D18:2-22:5	838.594	1.41463	2.12322	0.13258	D18:0-22:5/D18:1-22:4	792.554	3.24935	3.48036	2.91171				20:4-20:1-18:0-18:0	755.033
D18:0-22:6	840.609	2.98596	2.95109	1.25596	D20:0-20:4/D18:0-22:4	794.57	5.55866	5.14618	4.69889				22:6-20:4-20:4-16:1 22:6-22:6-18:2-16:1	758.97	0.15585	0.162995
D18:0-22:5	842.625	1.81331	1.71659	1.52536	D20:0-20:3/D18:0-22:3	796.586	2.06265	2.02293	1.76694				22:6-20:4-18:2-18:2 22:6-20:4-20:4-16:0 22:6-22:6-18:1-16:1	759.978
D18:0-22:4/D20:0-20:4/D20:2-20:2	844.641	1.09948	0.726294	0.74411									22:6-20:4-18:2-18:1	760.986	0.186685	0.167463
D18:0-22:3/D20:0-20:3/D18:2-22:1	846.656	0.408882	0.323643	0.125951									22:6-20:4-18:1-18:1	761.994
D18:0-22:2/D20:0-20:2	848.672	0.554763	0.500331	0.337004									22:6-20:4-18:1-18:0 22:6-20:3-18:1-18:1	763.002
P20:1-22:6	850.63	0.388282	0.411326	0.310816									22:4-20:4-18:1-18:1 22:6-20:3-18:1-18:0	764.01
P20:1-22:4	854.661	0.211912	0.475609	0.232382									22:4-20:4-18:1-18:0	765.017
P20:0-22:2	860.708												22:6-20:4-20:4-18:3	770.97	0.0695874	0.0753746
P20:0-22:1	862.724												22:6-22:6-20:4-16:0 20:4-20:4-20:4-20:4 22:6-20:4-20:4-18:2 22:6-22:6-18:2-18:2	771.978	0.120172	0.131745
P21:1-22:6	864.646	0.0974361	0.221942	0.0762912									22:6-20:4-20:4-18:1	772.986	0.198574	0.201489
P21:1-22:5	866.661	0.145119	0.174317	0.233629									22:6-22:6-18:1-18:1 22:6-20:4-20:3-18:1	773.994	0.553541	0.557295
P21:1-22:4	868.677	0.165897	0.191401	0.203107									O-22:6-22:6-18:0-18:1 O-22:6-20:3-20:4-18:0	782.999	0.157704	0.147109
D20:0-22:5/D20:1-22:4	870.656												20:4-20:4-22:6-22:6	795.978	0.273062	0.199887
D20:0-22:4/D20:2-22:2	872.672												22:6-22:6-22:6-18:1 22:6-22:6-20:4-20:3	796.986	0.17881	0.136626
D20:0-22:3/D20:2-22:1	874.688												20:4-20:3-22:6-22:5 22:6-22:6-22:6-18:0 22:6-22:6-22:5-18:1	797.994	0.164375	0.156398
D20:0-22:2/D20:2-22:0	876.703	0.194555	0.176934	0.257863									20:4-22:6-22:6-22:6	807.978	0.210014	0.222415
D20:0-22:1	878.719	0.148081	0.138486	0.188933									20:4-22:6-22:6-22:5	808.986	0.223045	0.230281
D20:0-22:0	880.735												22:6-22:6-22:6-22:5	813.017	0.177978	0.18582

## Sheet: VM NM1 vivo
PC					PE					PG			CL
A14:0-16:0	698.568	0.199124	0.064851	0.193098	P16:0-18:2	698.512	2.21652	1.3647	1.62832	A16:0-16:0	707.523		18:1-16:1-16:1-16:1	684.955
D14:0-16:1	710.531	0.928734	0.555693	0.657687	P18:1-16:0/P16:0-18:1	700.528	2.78579	2.31886	2.24318	16:0-16:1	719.486	0.419151	18:1-16:1-16:1-16:0	685.963
D14:0-16:0	712.547	1.23091	0.73521	1.16421	P18:0-16:0/P16:0-18:0	702.544	1.60102	1.04002	1.05853	16:0-16:0	721.502	0.166488	18:1-16:1-16:0-16:0	686.97	1.16428	1.2658	0.705284
P16:0-16:1/P16:1-16:0/P18:1-14:0	722.568	0.162228	0.0702422	0.0733541	D16:1-18:2	712.492	2.96255	1.43981	1.46409	16:1-18:2	743.486	0.29845	18:2-18:1-16:1-16:1	698.97	0.868341	0.871313	0.896888
P16:0-16:0/A16:0-16:1	724.583	0.256807	0.213664	0.235294	D16:0-18:2/D16:1-18:1	714.507	4.96473	2.46206	2.52356	16:0-18:2	745.502	0.79513	18:1-18:1-16:1-16:1	699.978	0.663839	0.569337	0.64509
A16:0-16:0	726.599	0.583143	0.464999	0.336403	D16:0-18:1	716.523	3.56839	2.57144	2.55182	16:0-18:1	747.518	1.78772	18:1-18:1-16:0-16:1 18:2-18:1-16:0-16:0 18:2-18:0-16:1-16:0	700.986	0.451612	0.622791	0.46756
D16:1-16:1/D14:1-18:1	736.547	1.10276	0.944621	1.08391	P14:0-22:6	718.481	2.4287	1.61158	1.46217	18:2-18:2	769.502	0.333171	18:1-18:1-16:0-16:0 18:2-18:0-16:0-16:0 18:1-18:0-16:0-16:1	701.994	0.510609	0.455749	0.445798
D16:1-16:0/D14:1-18:0	738.563	5.56943	4.38466	5.50887	P16:1-20:4/ P14:0-22:5	720.497	2.20774	1.84731	1.90737	18:1-18:2	771.518	0.513355	20:4-18:2-16:1-16:1	709.963
D16:0-16:0	740.578	4.24315	3.77887	4.17854	P16:0-20:4	722.512	8.13753	7.92767	8.18409	18:1-18:1	773.533	0.833729	20:4-18:1-16:1-16:1 20:4-18:2-16:1-16:0	710.97
P16:0-18:2/A16:0-18:3	748.583	0.160625	0.0604897	0.0593505	P16:0-20:3/P18:1-18:2	724.528	3.91376	3.05061	3.01579	18:0-18:1	775.549	0.518725	20:4-18:1-16:1-16:0 18:2-18:2-18:1-16:1	711.978	1.89899	1.89682	1.93214
P16:0-18:1/P18:1-16:0	750.599	0.429663	0.311499	0.298084	P18:1-18:1/P18:0-18:2/P16:0-20:2	726.544	2.22192	1.72673	1.88188				18:2-18:1-18:1-16:1 18:1-18:1-18:1-16:2 18:2-18:1-18:0-16:2 18:2-18:2-18:0-16:1	712.986	2.02571	1.92634	1.79896
P16:0-18:0/P18:0-16:0/A18:1-16:0/A16:0-18:1	752.615	1.12927	0.952185	0.970058	P18:0-18:1/P16:0-20:1	728.559	1.90319	1.62631	1.66208				18:1-18:1-18:1-16:1 18:2-18:1-18:1-16:0	713.994	1.42352	1.37647	1.2633
D14:1-20:3/D16:2-18:2/D14:0-20:4	760.547	0.385317	0.281431	0.360377	A18:0-18:1	730.575	5.55375	4.78688	4.69372				18:1-18:1-18:1-16:0 18:0-18:1-18:1-16:1	715.002	0.672168	0.571236	0.521894
D16:1-18:2	762.563	1.24135	1.20014	1.42803	D14:1-22:6	732.46	2.53304	1.49452	1.50445				18:0-18:1-18:1-16:0 18:0-18:0-18:1-16:1	716.01	1.21902	0.358076	0.689103
D16:0-18:2	764.578	9.76727	8.89219	9.49598	D16:2-20:4/D14:1-22:5	734.476	2.07617	1.21645	1.18967				O-20:4-18:1-16:1-16:0 O-18:2-18:2-18:1-16:1	719.976
D16:0-18:1	766.594	12.1891	11.6855	12.7118	D16:1-20:4	736.492	4.24777	2.58014	2.58665				O-18:2-18:1-18:1-16:1 O-18:1-18:1-18:1-16:2 O-18:2-18:1-18:0-16:2 O-18:2-18:2-18:0-16:1	720.984
D16:0-18:0	768.609	1.2859	1.05364	1.27888	D16:0-20:4/D18:2-18:2	738.507	4.33026	3.70532	3.77552				20:4-20:4-16:1-16:1	721.963
P16:0-20:4/P20:4-16:0/P18:2-18:2	772.583	0.190963	0.106661	0.165592	D18:1-18:2/D16:0-20:3	740.523	3.45534	3.15592	3.10089				20:4-20:4-16:1-16:0 20:4-18:2-18:2-16:1	722.97	0.721789	0.567137	0.52464
A16:0-20:4	774.599	0.34333	0.293181	0.345228	D18:0-18:2/D18:1-18:1/D16:0-20:2	742.539	5.479	4.80393	5.07266				20:4-18:2-18:1-16:1	723.978	2.02274	2.29627	2.38927
P18:1-18:1	776.615	0.319955	0.305215	0.359216	D18:0-18:1/D16:0-20:1	744.554	17.0627	11.5562	12.0475				20:4-18:2-18:1-16:0 20:4-18:1-18:1-16:1	724.986	3.32241	3.28114	3.53592
P18:0-18:1/P18:1-18:0	778.63	1.30901	0.993443	0.999968	P16:0-22:6/D18:0-18:0/P18:2-20:4	746.512	5.0078	3.96837	4.33801				20:4-18:1-18:1-16:0 20:3-18:1-18:1-16:1 20:3-18:1-18:1-16:1	725.994	3.72077	3.81547	4.26567
A18:0-18:1/P18:0-18:0	780.646	5.12267	3.8489	4.46568	P18:1-20:4/P16:0-22:5	748.528	9.80667	9.74371	9.49233				18:2-18:1-18:1-18:1	727.002	1.38252	1.6327	1.55718
A16:0-20:0	782.661	6.95761	5.50708	6.31668	P18:0-20:4/P16:0-22:4/P18:1-20:3	750.544	8.02414	7.37387	7.63669				18:1-18:1-18:1-18:1	728.01	0.656597	0.73815	0.559612
D18:2-18:3/D16:1-20:4	786.563	0.941497	0.805495	0.961444	P18:0-20:3	752.559	2.95676	2.30543	2.41034				18:1-18:1-18:1-18:0	729.017	0.355149	0.376122	0.261629
D18:2-18:2/D16:0-20:4	788.578	8.94637	8.79072	9.164	P20:1-18:1/P18:1-20:1	754.575	2.30657	1.22003	1.24258				O-20:4-20:4-16:1-16:0 O-20:4-18:2-18:2-16:1	730.968
D18:1-18:2/D16:0-20:3	790.594	5.29399	5.26462	5.85531	P18:1-20:0	756.591	1.46462	0.931724	0.888172				O-20:4-18:2-18:1-16:1	731.976
D18:0-18:2/D18:1-18:1	792.609	8.73502	7.64824	7.9923	P20:0-18:0/P18:0-20:0	758.476	2.26795	1.51297	1.54042				22:6-20:4-16:1-16:1	733.963
D18:0-18:1	794.625	3.22188	2.24505	2.73442	D16:1-22:6	760.492	2.52073	1.66983	1.77981				20:4-20:4-18:2-16:1	734.97
D18:0-18:0	796.641	0.829419	0.283213	0.472332	D16:0-22:6	762.507	3.70659	3.30145	3.39491				20:4-20:4-18:1-16:1	735.978	0.742337	0.524015	0.624998
P18:1-20:4	798.599	0.195242	0.155251	0.165998	D18:1-20:4/D16:0-22:5	764.523	9.48134	8.7337	9.31982				20:4-20:4-18:1-16:0 22:6-18:1-18:1-16:1 22:6-18:2-18:1-16:0	736.986	1.29398	1.12179	1.11839
P18:0-20:4	800.615	0.601566	0.615459	0.587265	D18:1-20:3/D18:0-20:4/D16:0-22:4	766.539	18.3534	16.9979	18.1717				20:4-18:2-18:1-18:1 22:6-18:1-18:1-16:0	737.994	1.50426	1.08293	1.05124
P18:2-20:1/P20:1-18:2/A18:0-20:4	802.63	0.663143	0.655808	0.711675	D18:0-20:3/D18:1-20:2/D16:0-22:3	768.554	4.19932	3.76685	3.84209				20:4-18:1-18:1-18:1	739.002	0.817479	0.728464	0.893985
A18:0-20:0	810.693	2.21104	1.74647	1.83712	P18:2-22:6/D18:1-20:1	770.512	1.93699	1.29551	1.27472				20:4-18:1-18:1-18:0 20:3-18:1-18:1-18:1	740.01	1.35929	0.607442	0.848363
D16:0-22:6/D18:2-20:4	812.578	1.88099	1.89916	1.80599	P18:1-22:6/D18:0-20:1	772.528	3.487	2.69297	3.03322				20:4-18:1-18:0-18:0 20:3-18:1-18:1-18:0	741.017
D18:1-20:4/D16:0-22:5	814.594	3.66572	3.77237	3.81408	P18:0-22:6/P18:1-22:5/D18:0-20:0	774.544	4.47831	3.51745	3.95891				O-20:4-20:4-18:1-16:1	743.976
D18:2-20:2/D18:0-20:4	816.609	7.86487	7.71928	8.01111	P18:0-22:5/P18:1-22:4	776.559	4.3722	3.91434	3.95908				22:6-18:3-18:2-18:2	746.97
D18:0-20:3	818.625	0.749675	0.219192	0.389381	P18:0-22:4/P20:0-20:4/P18:1-22:3	778.575	3.39422	2.42085	2.64756				20:4-20:4-18:2-18:2 20:4-20:4-20:4-16:0 22:6-20:4-18:1-16:1 22:6-22:6-16:0-16:0 22:6-18:2-18:2-18:2	747.978
D18:0-20:2/P18:2-22:6	820.641	0.446966	0.0893627	0.141922	A20:0-20:4/P18:0-22:3	780.591	3.23261	2.32598	2.44147				20:4-20:4-18:2-18:1	748.986
D18:0-20:1/P18:1-22:6	822.656	0.357475	0.202466	0.207638	P18:0-22:2	782.606	2.12928	1.64839	1.62245				20:4-20:4-18:1-18:1	749.994
P18:0-22:6	824.615	0.129263	0.116243	0.10047	D18:2-22:6	786.507	2.59147	1.75348	1.85943				22:6-18:1-18:1-18:1 20:4-20:3-18:1-18:1	751.002
A18:0-22:6/P18:0-22:5	826.63	0.241671	0.193001	0.153127	D18:1-22:6	788.523	5.02563	3.92417	4.0875				22:6-18:1-18:1-18:0	752.01
D18:2-22:6	836.578	0	0	0	D18:0-22:6/D18:1-22:5	790.539	6.77193	6.04355	6.59107				20:4-20:2-18:1-18:0 20:4-20:1-18:1-18:1	753.017
D18:1-22:6/D18:2-22:5	838.594	0.324637	0.319791	0.207799	D18:0-22:5/D18:1-22:4	792.554	5.53259	4.34262	4.78102				20:4-20:1-18:1-18:0	754.025
D18:0-22:6	840.609	0.936582	0.985004	0.81136	D20:0-20:4/D18:0-22:4	794.57	4.87228	4.08086	4.11041				20:4-20:1-18:0-18:0	755.033
D18:0-22:5	842.625	0.640946	0.625858	0.518398	D20:0-20:3/D18:0-22:3	796.586	3.10748	2.31033	2.234				22:6-20:4-20:4-16:1 22:6-22:6-18:2-16:1	758.97
D18:0-22:4/D20:0-20:4/D20:2-20:2	844.641	0.660494	0.55146	0.510479	D20:0-20:2/D18:0-22:2	798.601	2.36356	1.40793	1.42961				22:6-20:4-18:2-18:2 22:6-20:4-20:4-16:0 22:6-22:6-18:1-16:1	759.978
D18:0-22:3/D20:0-20:3/D18:2-22:1	846.656	0.373951	0.147632	0.163566									22:6-20:4-18:2-18:1	760.986
D18:0-22:2/D20:0-20:2	848.672	0.294166	0.162657	0.112181									22:6-20:4-18:1-18:1	761.994
P20:1-22:6	850.63	0.0282767	0.0151293	0									22:6-20:4-18:1-18:0 22:6-20:3-18:1-18:1	763.002
P20:1-22:4	854.661	0.312656	0.281295	0.205974									22:4-20:4-18:1-18:1 22:6-20:3-18:1-18:0	764.01
P20:0-22:2	860.708	0.820658	0.653526	0.675309									22:4-20:4-18:1-18:0	765.017
P20:0-22:1	862.724	0.605804	0.498271	0.280755									22:6-20:4-20:4-18:3	770.97
P21:1-22:6	864.646	0.0583764	0.0390251	0									22:6-22:6-20:4-16:0 20:4-20:4-20:4-20:4 22:6-20:4-20:4-18:2 22:6-22:6-18:2-18:2	771.978
P21:1-22:5	866.661	0.0997831	0.0718546	0.0460145									22:6-20:4-20:4-18:1	772.986
P21:1-22:4	868.677	0.122574	0.109669	0.0618555									22:6-22:6-18:1-18:1 22:6-20:4-20:3-18:1	773.994
D20:0-22:5/D20:1-22:4	870.656	0.10322	0.0877399	0.0716099									20:4-20:4-22:6-22:6	795.978
D20:0-22:4/D20:2-22:2	872.672	0.179967	0.0671066	0.0585459									22:6-22:6-22:6-18:1 22:6-22:6-20:4-20:3	796.986
D20:0-22:3/D20:2-22:1	874.688	0.105301	0.0837134	0.0485037									20:4-20:3-22:6-22:5 22:6-22:6-22:6-18:0 22:6-22:6-22:5-18:1	797.994
D20:0-22:2/D20:2-22:0	876.703	0.354367	0.209721	0.137984									20:4-22:6-22:6-22:6	807.978
D20:0-22:1	878.719	0.229679	0.152908	0.136994									22:6-22:6-22:6-22:5	813.017
D20:0-22:0	880.735	0.216416	0.155113	0.16433

[truncated: 8 more sheets: VM NS, CT2A vivo, VM M3 vivo, VM M3 vitro, liver, heart, brain, lung]
